# Supplementary material for: Attacking COVID-19 Progression Using Multi-Drug Therapy for Synergetic Target Engagement
Source: MDPI journal article supplement (doi:10.3390/biom11060787), 2021-05-23
Supplement: s1 [file s1]

Table S1. Extensive Chemoinformatics Properties and Physiochemical Properties of the Top 310 Compounds Screened for Ace2, TMPRSS2, and MPro

| Structure                                                                           | ENZYME | Docking_score | mol MW  | dipole | SASA    | FOSA    | FISA    | PISA    | WPSA   | volume   | donorHB | accptHB | logPo/w | logS   | ClogS  | logHERG | PCaco    | PMDCK    | logKp  | logKhsa | PSA   | RuleOf5 | RuleOf3 |
|-------------------------------------------------------------------------------------|--------|---------------|---------|--------|---------|---------|---------|---------|--------|----------|---------|---------|---------|--------|--------|---------|----------|----------|--------|---------|-------|---------|---------|
| 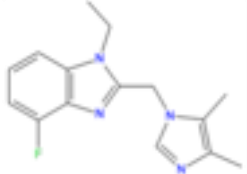   | ACE2   | -7.938425     | 272.324 | 9.772  | 544.879 | 283.009 | 32.461  | 184.837 | 44.572 | 930.925  | 0       | 3       | 4.118   | -4.429 | -4.304 | -4.902  | 4876.081 | 4811.036 | -1.179 | 0.391   | 35.64 | 0       | 0       |
|    | ACE2   | -7.936678     | 300.76  | 3.719  | 558.789 | 319.018 | 61.931  | 92.665  | 85.175 | 949.235  | 2       | 5.7     | 2.23    | -3.124 | -2.049 | -5.355  | 639.013  | 987.633  | -4.109 | -0.022  | 50.36 | 0       | 0       |
|  | ACE2   | -7.935508     | 349.45  | 9.231  | 659.658 | 411.299 | 102.348 | 95.226  | 50.784 | 1145.305 | 1       | 8.5     | 1.344   | -3.05  | -1.884 | -4.533  | 205.553  | 246.561  | -4.749 | -0.448  | 94.08 | 0       | 0       |
|  | ACE2   | -7.933447     | 333.433 | 6.286  | 622.384 | 529.83  | 81.265  | 11.289  | 0      | 1120.606 | 0       | 7       | 2.121   | -2.475 | -2.434 | -4.928  | 418.951  | 213.714  | -4.656 | -0.171  | 65.06 | 0       | 0       |

|                                                                                     |      |           |         |       |         |         |         |         |        |          |   |   |       |        |        |        |          |          |        |        |        |   |   |
|-------------------------------------------------------------------------------------|------|-----------|---------|-------|---------|---------|---------|---------|--------|----------|---|---|-------|--------|--------|--------|----------|----------|--------|--------|--------|---|---|
|                                                                                     |      |           |         |       |         |         |         |         |        |          |   |   |       |        |        |        |          |          |        |        |        |   |   |
| 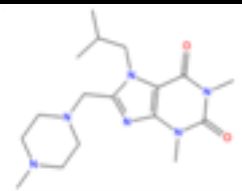   | ACE2 | -7.931598 | 348.447 | 6.124 | 646.555 | 553.566 | 83.215  | 9.774   | 0      | 1164.653 | 0 | 9 | 0.892 | -0.667 | -0.842 | -5.814 | 100.132  | 50.332   | -6.76  | -0.578 | 68.3   | 0 | 0 |
|    | ACE2 | -7.931379 | 302.351 | 3.532 | 586.418 | 248.96  | 77.722  | 212.94  | 46.794 | 1004.576 | 1 | 6 | 2.444 | -3.305 | -2.644 | -6.07  | 452.645  | 419.26   | -3.976 | 0.061  | 50.16  | 0 | 0 |
|  | ACE2 | -7.928268 | 275.386 | 5.192 | 522.396 | 149.158 | 28.54   | 250.81  | 93.888 | 870.281  | 1 | 3 | 3.394 | -3.42  | -3.307 | -5.981 | 1324.829 | 2424.322 | -2.937 | 0.279  | 86.33  | 0 | 0 |
|  | ACE2 | -7.921568 | 334.395 | 7.906 | 614.473 | 253.135 | 141.522 | 219.816 | 0      | 1053.224 | 2 | 9 | 0.853 | -2.383 | -2.313 | -6.304 | 112.395  | 51.546   | -4.936 | -0.415 | 104.29 | 0 | 0 |

|                                                                                     |      |           |         |       |         |         |         |         |         |          |   |   |       |        |        |        |          |          |        |        |       |   |   |
|-------------------------------------------------------------------------------------|------|-----------|---------|-------|---------|---------|---------|---------|---------|----------|---|---|-------|--------|--------|--------|----------|----------|--------|--------|-------|---|---|
|                                                                                     |      |           |         |       |         |         |         |         |         |          |   |   |       |        |        |        |          |          |        |        |       |   |   |
| 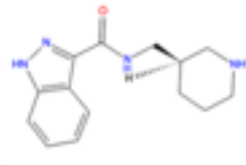   | ACE2 | -7.917339 | 258.322 | 5.446 | 520.712 | 217.024 | 125.653 | 178.034 | 0       | 881.416  | 2 | 4 | 1.791 | -2.565 | -2.356 | -5.473 | 158.938  | 74.964   | -4.983 | 0.081  | 69.81 | 0 | 0 |
|    | ACE2 | -7.91669  | 253.731 | 4.3   | 481.915 | 114.951 | 113.908 | 184.493 | 68.563  | 813.798  | 5 | 4 | 0.088 | 1.397  | 0.164  | -6.617 | 12.776   | 14.283   | -6.422 | -0.506 | 77.21 | 0 | 2 |
|  | ACE2 | -7.915507 | 283.296 | 3.095 | 546.024 | 202.847 | 38.229  | 187.17  | 117.778 | 919.44   | 1 | 3 | 3.604 | -3.555 | -3.363 | -5.781 | 1072.197 | 2606.997 | -3.243 | 0.368  | 29.85 | 0 | 0 |
|  | ACE2 | -7.915427 | 284.403 | 4.693 | 550.797 | 282.058 | 43.791  | 224.948 | 0       | 1000.801 | 1 | 5 | 2.398 | -1.29  | -1.627 | -6.023 | 236.825  | 127.626  | -5.179 | 0.183  | 33.09 | 0 | 0 |

|                                                                                     |      |           |         |       |         |         |         |         |        |          |   |      |        |        |        |        |          |          |        |        |        |   |   |
|-------------------------------------------------------------------------------------|------|-----------|---------|-------|---------|---------|---------|---------|--------|----------|---|------|--------|--------|--------|--------|----------|----------|--------|--------|--------|---|---|
|                                                                                     |      |           |         |       |         |         |         |         |        |          |   |      |        |        |        |        |          |          |        |        |        |   |   |
| 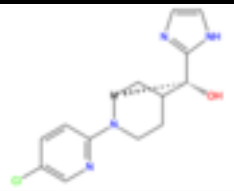   | ACE2 | -7.910061 | 292.767 | 7.97  | 547.317 | 153.991 | 94.892  | 226.364 | 72.07  | 930.771  | 2 | 4.7  | 2.901  | -4.364 | -3.95  | -5.163 | 1247.489 | 1559.383 | -2.183 | 0.093  | 65.04  | 0 | 0 |
|    | ACE2 | -7.909158 | 323.394 | 2.888 | 627.736 | 186.463 | 61.344  | 379.929 | 0      | 1086.965 | 1 | 5.95 | 3.153  | -3.348 | -3.323 | -7.072 | 647.248  | 341.995  | -2.798 | 0.153  | 50.52  | 0 | 0 |
|  | ACE2 | -7.907147 |         |       |         |         |         |         |        |          |   |      |        |        |        |        |          |          |        | 89.8   |        |   |   |
|  | ACE2 | -7.906252 | 292.358 | 11.11 | 559.083 | 243.065 | 150.945 | 118.12  | 46.954 | 939.382  | 2 | 8    | -0.054 | -1.667 | -1.119 | -4.203 | 57.609   | 74.614   | -5.756 | -0.693 | 115.04 | 0 | 0 |

|                                                                                     |      |           |         |       |         |         |         |         |        |          |   |     |       |        |        |        |         |         |        |        |       |   |   |
|-------------------------------------------------------------------------------------|------|-----------|---------|-------|---------|---------|---------|---------|--------|----------|---|-----|-------|--------|--------|--------|---------|---------|--------|--------|-------|---|---|
|                                                                                     |      |           |         |       |         |         |         |         |        |          |   |     |       |        |        |        |         |         |        |        |       |   |   |
| 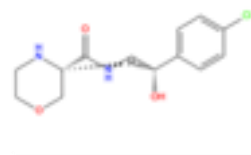   | ACE2 | -7.905742 | 284.742 | 5.458 | 504.984 | 230.116 | 79.286  | 124.069 | 71.514 | 880.649  | 3 | 7.4 | 0.38  | -0.829 | -0.945 | -3.419 | 297.932 | 551.908 | -4.126 | -0.792 | 70.59 | 0 | 0 |
|    | ACE2 | -7.900215 | 256.252 | 7.699 | 525.185 | 171.196 | 123.507 | 153.165 | 77.316 | 859.712  | 3 | 5.2 | 1.218 | -1.824 | -1.659 | -5.698 | 166.564 | 209.116 | -4.647 | -0.385 | 64.35 | 0 | 0 |
|  | ACE2 | -7.895666 | 302.378 | 5.754 | 598.413 | 315.985 | 110.926 | 171.501 | 0      | 1036.508 | 2 | 7.5 | 1.497 | -2.728 | -2.051 | -5.864 | 219.224 | 106.122 | -4.638 | -0.15  | 76.77 | 0 | 0 |
|  | ACE2 | -7.891833 | 290.408 | 3.331 | 617.599 | 468.485 | 38.841  | 110.273 | 0      | 1061.713 | 1 | 7.7 | 1.531 | -1.481 | -0.283 | -6.505 | 263.856 | 143.442 | -5.492 | -0.216 | 40.63 | 0 | 0 |

|                                                                                     |      |           |         |       |         |         |         |         |        |          |   |     |       |        |        |        |         |         |        |       |       |   |   |
|-------------------------------------------------------------------------------------|------|-----------|---------|-------|---------|---------|---------|---------|--------|----------|---|-----|-------|--------|--------|--------|---------|---------|--------|-------|-------|---|---|
|                                                                                     |      |           |         |       |         |         |         |         |        |          |   |     |       |        |        |        |         |         |        |       |       |   |   |
| 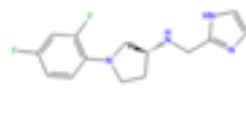   | ACE2 | -7.890993 | 278.304 | 7.324 | 531.383 | 158.202 | 57.648  | 237.625 | 77.908 | 895.448  | 2 | 4   | 2.711 | -3.085 | -2.866 | -5.891 | 701.663 | 996.996 | -3.519 | 0.112 | 43.95 | 0 | 0 |
|    | ACE2 | -7.890335 | 329.419 | 5.949 | 602.159 | 337.191 | 100.271 | 120.072 | 44.625 | 1040.367 | 1 | 7   | 1.979 | -3.373 | -2.974 | -5.669 | 276.652 | 239.597 | -4.815 | 0     | 95.05 | 0 | 0 |
|  | ACE2 | -7.881457 | 279.289 | 4.953 | 510.805 | 149.085 | 57.177  | 225.398 | 79.145 | 873.757  | 1 | 5.2 | 2.258 | -2.265 | -2.5   | -5.513 | 708.905 | 1023.97 | -3.458 | -0.15 | 41.29 | 0 | 0 |
|  | ACE2 | -7.878207 | 327.829 | 6.222 | 626.962 | 351.534 | 40.968  | 140.929 | 93.531 | 1084.179 | 1 | 6.5 | 2.547 | -2.321 | -1.664 | -6.665 | 251.886 | 443.859 | -5.327 | 0.037 | 35.58 | 0 | 0 |

|                                                                                     |      |           |         |       |         |         |        |         |        |          |   |     |       |        |        |        |         |         |        |        |       |   |   |
|-------------------------------------------------------------------------------------|------|-----------|---------|-------|---------|---------|--------|---------|--------|----------|---|-----|-------|--------|--------|--------|---------|---------|--------|--------|-------|---|---|
|                                                                                     |      |           |         |       |         |         |        |         |        |          |   |     |       |        |        |        |         |         |        |        |       |   |   |
| 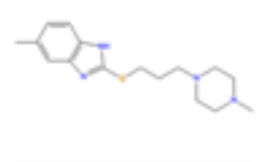   | ACE2 | -7.876119 | 304.452 | 5.813 | 635.876 | 407.626 | 46.279 | 141.559 | 40.411 | 1080.104 | 1 | 5.5 | 2.693 | -2.773 | -1.768 | -6.885 | 224.303 | 200.361 | -5.519 | 0.26   | 60.46 | 0 | 0 |
|    | ACE2 | -7.875927 | 340.427 | 6.363 | 684.886 | 324.008 | 88.45  | 272.429 | 0      | 1175.491 | 2 | 6.5 | 2.348 | -3.739 | -2.669 | -5.638 | 240.159 | 180.381 | -3.869 | 0.013  | 73.39 | 0 | 0 |
|  | ACE2 | -7.875737 | 349.426 | 4.416 | 641.986 | 304.786 | 74.281 | 192.482 | 70.437 | 1147.227 | 3 | 5   | 2.969 | -2.8   | -2.703 | -6.725 | 121.7   | 151.103 | -5.76  | 0.387  | 68.76 | 0 | 0 |
|  | ACE2 | -7.871089 | 271.278 | 5.947 | 519.363 | 152.81  | 93.57  | 272.983 | 0      | 869.545  | 0 | 7   | 0.704 | -0.849 | -1.483 | -6.014 | 320.238 | 159.847 | -4.153 | -0.815 | 73.12 | 0 | 0 |

|                                                                                     |      |           |         |       |         |         |         |         |         |          |   |     |       |        |        |        |          |          |        |        |        |   |   |
|-------------------------------------------------------------------------------------|------|-----------|---------|-------|---------|---------|---------|---------|---------|----------|---|-----|-------|--------|--------|--------|----------|----------|--------|--------|--------|---|---|
|                                                                                     |      |           |         |       |         |         |         |         |         |          |   |     |       |        |        |        |          |          |        |        |        |   |   |
| 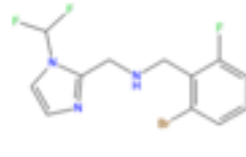   | ACE2 | -7.863935 | 334.138 | 2.142 | 509.836 | 75.993  | 23.768  | 241.955 | 168.12  | 856.065  | 1 | 3   | 3.613 | -3.357 | -4.403 | -5.755 | 1470.297 | 6920.453 | -2.784 | 0.201  | 29.85  | 0 | 0 |
|    | ACE2 | -7.861967 | 481.474 | 9.133 | 790.791 | 396.83  | 127.075 | 149.314 | 117.572 | 1423.417 | 2 | 9.2 | 3.975 | -6.111 | -6.181 | -5.903 | 617.801  | 1295.211 | -2.375 | 0.209  | 111.15 | 0 | 1 |
|  | ACE2 | -7.860086 | 266.73  | 9.811 | 526.892 | 235.096 | 111.367 | 114.63  | 65.799  | 871.074  | 2 | 6.2 | 1.184 | -3.232 | -2.244 | -5.44  | 217.124  | 240.843  | -4.847 | -0.329 | 69.97  | 0 | 0 |
|  | ACE2 | -7.85665  | 318.375 | 3.939 | 614.248 | 454.196 | 92.47   | 67.582  | 0       | 1051.232 | 1 | 9   | 0.506 | -1.118 | -0.751 | -6.316 | 81.809   | 40.456   | -6.727 | -0.457 | 70.69  | 0 | 0 |



|                                                                                     |      |           |         |        |         |         |         |         |        |          |   |      |       |        |        |        |         |         |        |        |        |   |   |
|-------------------------------------------------------------------------------------|------|-----------|---------|--------|---------|---------|---------|---------|--------|----------|---|------|-------|--------|--------|--------|---------|---------|--------|--------|--------|---|---|
|                                                                                     |      |           |         |        |         |         |         |         |        |          |   |      |       |        |        |        |         |         |        |        |        |   |   |
| 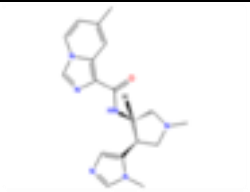   | ACE2 | -7.856272 | 338.411 | 10.408 | 636.211 | 309.067 | 81.807  | 245.337 | 0      | 1124.433 | 1 | 7.5  | 2.364 | -3.578 | -2.95  | -6.309 | 414.02  | 210.996 | -4.034 | 0.118  | 67.98  | 0 | 0 |
|    | ACE2 | -7.855813 | 299.372 | 4.632  | 569.586 | 295.145 | 116.651 | 157.79  | 0      | 997.834  | 2 | 4.25 | 2.454 | -3.166 | -3.192 | -5.473 | 193.465 | 92.711  | -4.792 | 0.296  | 67.01  | 0 | 0 |
|  | ACE2 | -7.85541  | 233.313 | 5.069  | 513.903 | 269.391 | 68.079  | 176.432 | 0      | 858.984  | 2 | 5    | 1.683 | -2.202 | -1.387 | -5.521 | 558.734 | 291.735 | -3.927 | -0.126 | 54.02  | 0 | 0 |
|  | ACE2 | -7.848658 | 415.441 | 16.725 | 692.807 | 0       | 144.333 | 445.163 | 103.31 | 1188.42  | 2 | 6    | 3.986 | -6.424 | -6.161 | -7.163 | 423.826 | 719.974 | -2.227 | 0.455  | 185.61 | 0 | 1 |

|                                                                                     |      |           |         |       |         |         |        |         |        |          |   |     |       |        |        |        |          |          |        |       |        |   |   |
|-------------------------------------------------------------------------------------|------|-----------|---------|-------|---------|---------|--------|---------|--------|----------|---|-----|-------|--------|--------|--------|----------|----------|--------|-------|--------|---|---|
|                                                                                     |      |           |         |       |         |         |        |         |        |          |   |     |       |        |        |        |          |          |        |       |        |   |   |
| 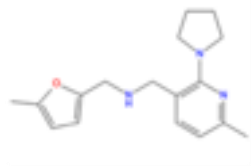   | ACE2 | -7.84725  | 285.388 | 2.357 | 571.612 | 376.031 | 12.28  | 183.301 | 0      | 1020.663 | 1 | 3.5 | 3.824 | -3.556 | -3.257 | -5.435 | 1889.488 | 1088.742 | -2.779 | 0.556 | 41.3   | 0 | 0 |
|    | ACE2 | -7.847098 |         |       |         |         |        |         |        |          |   |     |       |        |        |        |          |          |        |       | 41.13  |   |   |
|  | ACE2 | -7.845325 |         |       |         |         |        |         |        |          |   |     |       |        |        |        |          |          |        |       | 84.4   |   |   |
|  | ACE2 | -7.843258 | 367.443 | 5.873 | 596.154 | 43.878  | 70.811 | 393.663 | 87.801 | 1071.28  | 1 | 6.5 | 3.608 | -4.368 | -5.288 | -5.847 | 2110.551 | 3357.039 | -0.958 | 0.065 | 126.24 | 0 | 0 |

|                                                                                     |      |           |         |       |         |         |        |         |        |          |   |     |       |        |        |        |          |          |        |        |       |   |   |
|-------------------------------------------------------------------------------------|------|-----------|---------|-------|---------|---------|--------|---------|--------|----------|---|-----|-------|--------|--------|--------|----------|----------|--------|--------|-------|---|---|
|                                                                                     |      |           |         |       |         |         |        |         |        |          |   |     |       |        |        |        |          |          |        |        |       |   |   |
| 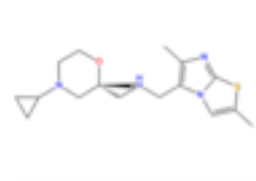   | ACE2 | -7.838944 | 320.452 | 6.234 | 610.877 | 488.308 | 31.854 | 42.526  | 48.189 | 1080.76  | 1 | 6.7 | 2.229 | -2.1   | -1.367 | -5.877 | 307.346  | 310.653  | -5.698 | 0.084  | 70.56 | 0 | 0 |
|    | ACE2 | -7.835397 | 373.445 | 4.832 | 635.405 | 220.03  | 82.851 | 267.927 | 64.597 | 1186.687 | 3 | 6   | 2.248 | -1.504 | -2.303 | -5.264 | 66.778   | 114.668  | -5.556 | -0.006 | 58.36 | 0 | 1 |
|  | ACE2 | -7.83441  | 315.417 | 4.25  | 617.372 | 402.259 | 40.969 | 174.143 | 0      | 1086.584 | 1 | 6.2 | 2.904 | -3.402 | -2.884 | -5.873 | 1009.929 | 553.181  | -3.34  | 0.195  | 55.21 | 0 | 0 |
|  | ACE2 | -7.830545 | 347.407 | 2.247 | 671.348 | 331.326 | 25.891 | 231.222 | 82.909 | 1154.441 | 1 | 4.7 | 4.429 | -5.267 | -4.168 | -6.715 | 1403.718 | 2246.975 | -2.861 | 0.661  | 37.39 | 0 | 0 |

|                                                                                     |      |           |         |       |         |         |         |         |        |          |   |     |       |        |        |        |         |         |        |        |       |   |   |
|-------------------------------------------------------------------------------------|------|-----------|---------|-------|---------|---------|---------|---------|--------|----------|---|-----|-------|--------|--------|--------|---------|---------|--------|--------|-------|---|---|
|                                                                                     |      |           |         |       |         |         |         |         |        |          |   |     |       |        |        |        |         |         |        |        |       |   |   |
| 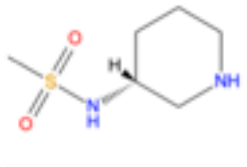   | ACE2 | -7.829874 | 178.249 | 5.142 | 391.406 | 279.732 | 111.674 | 0       | 0      | 624.607  | 2 | 6   | -0.49 | -0.311 | 0.181  | -3.83  | 215.673 | 104.266 | -5.448 | -0.688 | 66.58 | 0 | 0 |
|    | ACE2 | -7.82796  | 381.452 | 2.196 | 719.04  | 303.61  | 87.726  | 280.892 | 46.812 | 1253.44  | 2 | 8   | 2.521 | -3.488 | -2.682 | -7.853 | 90.738  | 81.666  | -5.792 | 0.217  | 64.26 | 0 | 0 |
|  | ACE2 | -7.82452  | 316.405 | 8.079 | 612.288 | 387.85  | 136.156 | 88.282  | 0      | 1072.757 | 2 | 7.5 | 0.917 | -1.894 | -1.244 | -6.193 | 31.516  | 14.428  | -7.555 | -0.02  | 86    | 0 | 0 |
|  | ACE2 | -7.822889 | 337.218 | 6.949 | 545.734 | 217.053 | 125.675 | 125.936 | 77.07  | 930.472  | 2 | 4   | 2.322 | -3.325 | -3.905 | -5.373 | 158.864 | 198.072 | -5.167 | 0.202  | 69.81 | 0 | 0 |



|                                                                                     |      |           |         |       |         |         |         |         |        |          |   |     |        |        |        |        |          |         |        |        |        |   |   |
|-------------------------------------------------------------------------------------|------|-----------|---------|-------|---------|---------|---------|---------|--------|----------|---|-----|--------|--------|--------|--------|----------|---------|--------|--------|--------|---|---|
|                                                                                     |      |           |         |       |         |         |         |         |        |          |   |     |        |        |        |        |          |         |        |        |        |   |   |
| 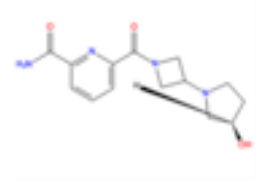   | ACE2 | -7.815683 | 290.321 | 5.526 | 553.428 | 228.138 | 202.254 | 123.036 | 0      | 945.322  | 3 | 9.2 | -0.423 | -1.69  | -0.858 | -5.406 | 29.842   | 12.294  | -6.492 | -0.574 | 99.76  | 0 | 0 |
|    | ACE2 | -7.813326 | 324.341 | 9.785 | 598.382 | 282.669 | 100.585 | 215.128 | 0      | 1028.889 | 0 | 6.5 | 2.398  | -3.828 | -4.025 | -5.411 | 1101.678 | 549.296 | -2.423 | -0.219 | 79.64  | 0 | 0 |
|  | MPRO | -7.809379 | 429.498 | 7.068 | 744.24  | 171.578 | 147.031 | 391.51  | 34.121 | 1310.612 | 2 | 5.5 | 4.602  | -7.18  | -6.859 | -6.988 | 399.584  | 282.261 | -2.466 | 0.865  | 118.72 | 0 | 1 |
|  | MPRO | -7.802171 | 343.4   | 2.69  | 604.347 | 277.475 | 84.347  | 228.2   | 14.326 | 1103.452 | 3 | 4.5 | 3.087  | -3.964 | -4.295 | -3.6   | 1076.198 | 965.432 | -1.79  | 0.088  | 70.23  | 0 | 0 |

|                                                                                     |      |           |         |        |         |         |         |         |        |          |   |     |       |        |        |        |         |         |        |       |        |   |   |
|-------------------------------------------------------------------------------------|------|-----------|---------|--------|---------|---------|---------|---------|--------|----------|---|-----|-------|--------|--------|--------|---------|---------|--------|-------|--------|---|---|
|                                                                                     |      |           |         |        |         |         |         |         |        |          |   |     |       |        |        |        |         |         |        |       |        |   |   |
| 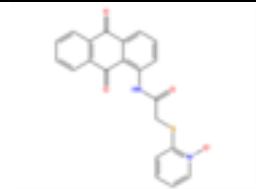   | MPRO | -7.802135 | 390.413 | 11.368 | 662.357 | 26.763  | 166.592 | 439.872 | 29.13  | 1155.438 | 0 | 6.5 | 3.141 | -4.841 | -5.548 | -6.802 | 260.679 | 167.033 | -2.656 | 0.064 | 115.48 | 0 | 0 |
|    | MPRO | -7.800731 | 460.506 | 5.016  | 753.309 | 0       | 113.988 | 595.742 | 43.579 | 1348.951 | 0 | 6.5 | 5.005 | -6.953 | -7.576 | -7.872 | 822.157 | 693.669 | -1.33  | 0.71  | 104.37 | 1 | 1 |
|  | ACE2 | -7.800908 | 345.403 | 8.746  | 638.095 | 134.667 | 93.068  | 410.36  | 0      | 1138.093 | 1 | 6   | 3.126 | -4.5   | -4.403 | -4.927 | 954.948 | 655.922 | -1.405 | 0.048 | 64.74  | 0 | 0 |
|  | MPRO | -7.796552 | 486.44  | 10.331 | 754.515 | 111.825 | 221.391 | 421.299 | 0      | 1373.452 | 1 | 8.5 | 3.277 | -5.812 | -7.117 | -6.907 | 78.785  | 31.735  | -3.54  | 0.381 | 148.71 | 1 | 1 |

|                                                                                     |      |           |         |       |         |         |         |         |        |          |   |      |       |        |        |        |          |         |        |        |        |   |   |
|-------------------------------------------------------------------------------------|------|-----------|---------|-------|---------|---------|---------|---------|--------|----------|---|------|-------|--------|--------|--------|----------|---------|--------|--------|--------|---|---|
|                                                                                     |      |           |         |       |         |         |         |         |        |          |   |      |       |        |        |        |          |         |        |        |        |   |   |
| 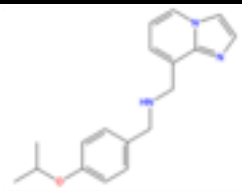   | ACE2 | -7.797499 | 295.383 | 2.583 | 616.302 | 242.961 | 30.087  | 343.254 | 0      | 1052.913 | 1 | 3.75 | 3.975 | -3.943 | -3.563 | -6.935 | 1280.802 | 715.163 | -2.351 | 0.496  | 39.08  | 0 | 0 |
|    | MPRO | -7.796011 | 308.247 | 7.028 | 526.269 | 106.344 | 243.929 | 99.542  | 76.454 | 875.269  | 4 | 6.5  | 0.456 | -3.657 | -3.654 | -4.582 | 48.164   | 48.903  | -5.472 | -0.333 | 119.32 | 0 | 0 |
|  | ACE2 | -7.796023 | 287.361 | 2.921 | 596.042 | 276.439 | 64.177  | 255.426 | 0      | 1011.002 | 1 | 5.95 | 2.464 | -2.797 | -2.374 | -6.432 | 608.429  | 319.879 | -3.289 | -0.045 | 50.52  | 0 | 0 |
|  | ACE2 | -7.795565 | 341.427 | 2.158 | 582.793 | 218.697 | 124.457 | 193.806 | 45.833 | 1083.165 | 3 | 5    | 2.074 | -1.853 | -3.075 | -3.827 | 82.233   | 137.463 | -4.713 | -0.019 | 58.36  | 0 | 0 |



|                                                                                    |      |           |         |       |         |         |         |         |         |          |      |      |       |        |        |        |         |         |        |        |        |   |   |
|------------------------------------------------------------------------------------|------|-----------|---------|-------|---------|---------|---------|---------|---------|----------|------|------|-------|--------|--------|--------|---------|---------|--------|--------|--------|---|---|
|                                                                                    |      |           |         |       |         |         |         |         |         |          |      |      |       |        |        |        |         |         |        |        |        |   |   |
| 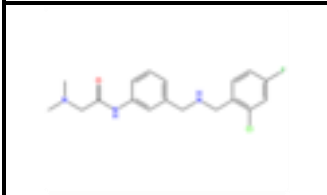   | ACE2 | -7.794252 | 349.835 | 6.238 | 671.614 | 250.845 | 57.184  | 257.632 | 105.953 | 1148.417 | 2    | 6    | 3.082 | -3.146 | -2.525 | -7.616 | 176.776 | 354.058 | -5.119 | 0.228  | 44.37  | 0 | 0 |
|    | MPRO | -7.792261 | 392.367 | 7.238 | 650.912 | 137.106 | 246.041 | 267.764 | 0       | 1159.617 | 0.25 | 9.25 | 0.581 | -2.106 | -3.656 | -4.346 | 19.375  | 17.737  | -4.727 | -0.719 | 118.64 | 0 | 1 |
|  | ACE2 | -7.790159 | 343.468 | 5.733 | 687.292 | 408.654 | 45.767  | 232.871 | 0       | 1211.439 | 1    | 7.25 | 2.738 | -2.682 | -1.781 | -7.337 | 226.824 | 121.811 | -5.092 | 0.213  | 44.81  | 0 | 1 |
|  | ACE2 | -7.789715 | 333.433 | 8.409 | 686.614 | 455.28  | 98.993  | 132.341 | 0       | 1177.328 | 2    | 6    | 2.32  | -3.616 | -2.29  | -4.989 | 175.776 | 140.644 | -4.46  | 0.063  | 86.36  | 0 | 0 |

|                                                                                     |      |           |         |        |         |         |         |         |        |          |   |       |        |        |        |        |          |          |        |        |        |   |   |
|-------------------------------------------------------------------------------------|------|-----------|---------|--------|---------|---------|---------|---------|--------|----------|---|-------|--------|--------|--------|--------|----------|----------|--------|--------|--------|---|---|
|                                                                                     |      |           |         |        |         |         |         |         |        |          |   |       |        |        |        |        |          |          |        |        |        |   |   |
| 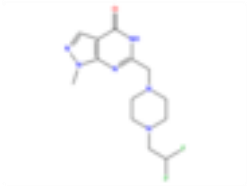   | ACE2 | -7.78928  | 312.322 | 5.161  | 579.858 | 317.827 | 112.376 | 62.363  | 87.292 | 983.218  | 1 | 8.5   | 0.495  | -1.272 | -0.769 | -6.119 | 52.971   | 76.056   | -7.208 | -0.478 | 70.05  | 0 | 0 |
|    | ACE2 | -7.787989 | 344.76  | 7.552  | 588.853 | 194.036 | 98.623  | 224.398 | 71.796 | 1011.681 | 0 | 6.5   | 2.584  | -3.96  | -4.458 | -5.391 | 1149.905 | 1423.039 | -2.355 | -0.269 | 79.64  | 0 | 0 |
|  | ACE2 | -7.785194 | 318.378 | 10.617 | 628.678 | 346.511 | 173.855 | 108.312 | 0      | 1071.896 | 2 | 11.25 | -0.798 | -0.551 | -0.034 | -6.645 | 13.837   | 5.926    | -7.891 | -0.806 | 90.14  | 0 | 1 |
|  | MPRO | -7.784198 | 542.605 | 8.531  | 914.847 | 151.081 | 178.885 | 584.056 | 0.825  | 1663.153 | 1 | 11    | 4.471  | -7.133 | -7.224 | -8.491 | 199.311  | 87.447   | -1.895 | 0.458  | 118.23 | 1 | 1 |

|                                                                                     |      |           |         |        |         |         |         |         |        |          |   |       |       |        |        |        |         |         |        |        |        |   |   |
|-------------------------------------------------------------------------------------|------|-----------|---------|--------|---------|---------|---------|---------|--------|----------|---|-------|-------|--------|--------|--------|---------|---------|--------|--------|--------|---|---|
|                                                                                     |      |           |         |        |         |         |         |         |        |          |   |       |       |        |        |        |         |         |        |        |        |   |   |
| 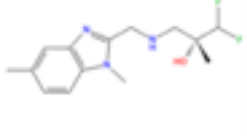   | ACE2 | -7.784154 | 283.32  | 5.234  | 537.948 | 278.944 | 63.875  | 120.085 | 75.044 | 929.309  | 2 | 3.75  | 2.833 | -2.924 | -2.889 | -5.159 | 612.456 | 830.184 | -3.856 | 0.158  | 50.08  | 0 | 0 |
|    | ACE2 | -7.783586 | 264.283 | 8.864  | 527.684 | 267.918 | 181.881 | 77.885  | 0      | 875.299  | 4 | 7.5   | -0.28 | -1.654 | -1.127 | -5.241 | 46.561  | 19.885  | -6.276 | -0.523 | 106.34 | 0 | 0 |
|  | MPRO | -7.783271 | 458.531 | 7.585  | 675.328 | 297.888 | 136.892 | 239.068 | 1.48   | 1307.122 | 3 | 11.75 | 1.876 | -3.537 | -4.531 | -5     | 498.6   | 237.554 | -2.528 | -0.275 | 125.22 | 0 | 1 |
|  | MPRO | -7.779582 | 384.409 | 12.546 | 674.308 | 174.154 | 201.658 | 265.462 | 33.034 | 1195.182 | 4 | 7.5   | 1.017 | -3.071 | -3.434 | -3.16  | 45.203  | 76.695  | -3.725 | -0.591 | 104.53 | 0 | 0 |

|                                                                                     |      |           |         |        |         |         |         |         |        |          |   |      |       |        |        |        |         |         |        |        |        |   |   |
|-------------------------------------------------------------------------------------|------|-----------|---------|--------|---------|---------|---------|---------|--------|----------|---|------|-------|--------|--------|--------|---------|---------|--------|--------|--------|---|---|
|                                                                                     |      |           |         |        |         |         |         |         |        |          |   |      |       |        |        |        |         |         |        |        |        |   |   |
| 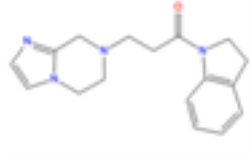   | ACE2 | -7.778121 | 296.371 | 4.355  | 585.58  | 249.575 | 67.651  | 268.354 | 0      | 1006.146 | 0 | 6.5  | 2.013 | -2.203 | -2.059 | -6.301 | 563.987 | 294.7   | -3.596 | -0.327 | 41.37  | 0 | 0 |
|    | MPRO | -7.771538 | 370.379 | 5.287  | 629.8   | 170.768 | 141.25  | 270.892 | 46.891 | 1131.779 | 1 | 6    | 2.772 | -4.338 | -4.536 | -4.136 | 322.834 | 380.068 | -2.688 | -0.007 | 84.5   | 0 | 0 |
|  | MPRO | -7.770157 | 386.422 | 10.037 | 702.02  | 181.112 | 192.741 | 327.14  | 1.026  | 1209.265 | 0 | 10   | 1.367 | -3.312 | -3.6   | -6.621 | 147.276 | 63.215  | -3.343 | -0.801 | 103.71 | 0 | 0 |
|  | MPRO | -7.769056 | 367.447 | 7.494  | 712.043 | 367.483 | 124.793 | 219.768 | 0      | 1241.885 | 1 | 7.25 | 2.786 | -4.571 | -3.98  | -4.689 | 376.848 | 310.223 | -2.469 | -0.036 | 61.88  | 0 | 0 |

|                                                                                     |      |           |         |        |         |         |         |         |        |          |   |      |       |        |        |        |         |         |        |        |        |   |   |
|-------------------------------------------------------------------------------------|------|-----------|---------|--------|---------|---------|---------|---------|--------|----------|---|------|-------|--------|--------|--------|---------|---------|--------|--------|--------|---|---|
|                                                                                     |      |           |         |        |         |         |         |         |        |          |   |      |       |        |        |        |         |         |        |        |        |   |   |
| 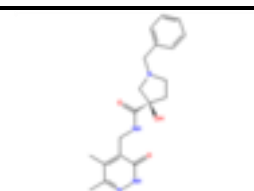   | MPRO | -7.768783 | 356.424 | 9.4    | 559.315 | 292.223 | 127.695 | 139.397 | 0      | 1085.211 | 2 | 6.25 | 1.559 | -1.305 | -3.01  | -2.955 | 96.565  | 71.437  | -4.868 | -0.164 | 98.32  | 0 | 0 |
|    | MPRO | -7.768639 | 436.528 | 10.148 | 697.187 | 282.049 | 110.368 | 281.773 | 22.996 | 1307.809 | 1 | 9.5  | 3.159 | -4.701 | -5.094 | -5.634 | 889.765 | 582.769 | -2.081 | 0.067  | 109.6  | 0 | 0 |
|  | MPRO | -7.762516 | 339.439 | 6.879  | 656.341 | 329.453 | 61.906  | 264.982 | 0      | 1150.589 | 1 | 5.5  | 2.924 | -3.942 | -2.978 | -5.237 | 468.603 | 337.495 | -3.502 | 0.217  | 53.4   | 0 | 0 |
|  | MPRO | -7.759647 | 488.545 | 5.389  | 694.663 | 249.863 | 207.423 | 237.377 | 0      | 1379.723 | 3 | 9.25 | 2.132 | -2.855 | -6.072 | -3.509 | 47.061  | 44.128  | -3.738 | -0.066 | 128.24 | 0 | 0 |

|                                                                                     |      |           |         |       |         |         |         |         |        |          |   |     |       |        |        |        |         |         |        |        |        |   |   |
|-------------------------------------------------------------------------------------|------|-----------|---------|-------|---------|---------|---------|---------|--------|----------|---|-----|-------|--------|--------|--------|---------|---------|--------|--------|--------|---|---|
|                                                                                     |      |           |         |       |         |         |         |         |        |          |   |     |       |        |        |        |         |         |        |        |        |   |   |
| 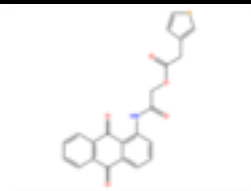   | MPRO | -7.757383 | 405.424 | 6.482 | 619.84  | 87.295  | 160.604 | 340.454 | 31.487 | 1149.737 | 0 | 7.5 | 2.551 | -3.359 | -5.343 | -5.481 | 297.091 | 198.195 | -2.8   | -0.263 | 117.78 | 0 | 0 |
|    | MPRO | -7.75727  | 387.496 | 7.587 | 650.312 | 265.245 | 165.626 | 217.858 | 1.583  | 1205.351 | 3 | 6.5 | 2.351 | -3.764 | -4.446 | -3.749 | 145.45  | 120.727 | -3.324 | 0.041  | 95.68  | 0 | 0 |
|  | MPRO | -7.756551 | 374.485 | 4.321 | 760.238 | 260.495 | 104.873 | 394.87  | 0      | 1316.145 | 1 | 8   | 2.835 | -4.507 | -3.357 | -8.686 | 62.4    | 30.189  | -5.514 | 0.273  | 59.37  | 0 | 0 |
|  | ACE2 | -7.751422 | 430.527 | 8.736 | 711.981 | 399.671 | 142.644 | 139.978 | 29.688 | 1304.677 | 1 | 9.5 | 2.376 | -3.763 | -4.096 | -5.984 | 109.675 | 73.002  | -5.238 | 0.046  | 130.24 | 0 | 0 |

|                                                                                     |      |           |         |        |         |         |         |         |        |          |   |      |       |        |        |        |         |         |        |        |        |   |   |
|-------------------------------------------------------------------------------------|------|-----------|---------|--------|---------|---------|---------|---------|--------|----------|---|------|-------|--------|--------|--------|---------|---------|--------|--------|--------|---|---|
|                                                                                     |      |           |         |        |         |         |         |         |        |          |   |      |       |        |        |        |         |         |        |        |        |   |   |
| 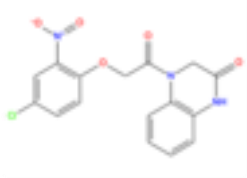   | MPRO | -7.749496 | 361.741 | 7.181  | 574.598 | 20.995  | 201.398 | 280.617 | 71.589 | 1002.489 | 1 | 7.25 | 1.772 | -3.83  | -4.572 | -5.41  | 121.91  | 125.496 | -3.859 | -0.218 | 101.78 | 0 | 0 |
|    | MPRO | -7.749195 | 360.415 | 9.576  | 583.777 | 53.382  | 175.571 | 354.824 | 0      | 1100.269 | 4 | 6    | 1.838 | -2.878 | -4.375 | -3.744 | 142.862 | 93.584  | -2.929 | -0.217 | 97.11  | 0 | 1 |
|  | MPRO | -7.748233 | 403.495 | 5.632  | 746.619 | 303.685 | 179.365 | 261.749 | 1.819  | 1288.501 | 3 | 9.75 | 1.602 | -3.966 | -3.24  | -7.277 | 49.191  | 21.591  | -5.294 | -0.12  | 110.11 | 0 | 0 |
|  | MPRO | -7.747528 | 391.469 | 10.529 | 740.772 | 294.389 | 158.077 | 288.306 | 0      | 1294.132 | 2 | 8    | 2.538 | -5.302 | -4.267 | -5.169 | 216.158 | 141.42  | -2.937 | -0.006 | 78.51  | 0 | 0 |

|                                                                                     |      |           |         |        |         |         |         |         |        |          |   |      |       |        |        |        |         |         |        |        |        |   |   |
|-------------------------------------------------------------------------------------|------|-----------|---------|--------|---------|---------|---------|---------|--------|----------|---|------|-------|--------|--------|--------|---------|---------|--------|--------|--------|---|---|
|                                                                                     |      |           |         |        |         |         |         |         |        |          |   |      |       |        |        |        |         |         |        |        |        |   |   |
| 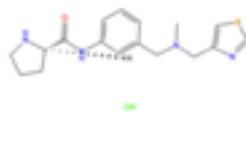   | ACE2 | -7.740865 |         |        |         |         |         |         |        |          |   |      |       |        |        |        |         |         |        |        | 85.5   |   |   |
|    | ACE2 | -7.740514 | 307.352 | 5.373  | 554.897 | 418.338 | 77.38   | 59.179  | 0      | 981.695  | 0 | 8.7  | 0.47  | -0.306 | -1.156 | -4.792 | 456.043 | 234.237 | -4.416 | -1.029 | 74.29  | 0 | 0 |
|  | MPRO | -7.740255 | 383.446 | 10.161 | 593.829 | 343.692 | 89.354  | 160.783 | 0      | 1137.518 | 3 | 6    | 2.615 | -3.194 | -4.668 | -2.746 | 953.915 | 716.011 | -2.024 | -0.057 | 88.69  | 0 | 0 |
|  | MPRO | -7.739322 | 427.56  | 7.751  | 726.557 | 329.669 | 102.613 | 262.358 | 31.917 | 1341.482 | 3 | 8.25 | 2.568 | -3.655 | -3.17  | -5.215 | 193.632 | 193.133 | -3.877 | -0.015 | 109.96 | 0 | 1 |



|                                                                                     |      |           |         |        |         |         |         |         |        |          |   |      |       |        |        |        |         |         |        |        |        |   |   |
|-------------------------------------------------------------------------------------|------|-----------|---------|--------|---------|---------|---------|---------|--------|----------|---|------|-------|--------|--------|--------|---------|---------|--------|--------|--------|---|---|
|                                                                                     |      |           |         |        |         |         |         |         |        |          |   |      |       |        |        |        |         |         |        |        |        |   |   |
| 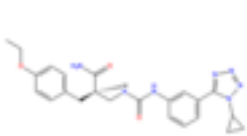   | MPRO | -7.739139 | 449.511 | 15.893 | 841.599 | 353.054 | 233.968 | 254.577 | 0      | 1469.136 | 3 | 7.25 | 2.539 | -5.442 | -4.866 | -4.162 | 20.767  | 23.585  | -4.167 | 0.053  | 137.05 | 0 | 1 |
|    | MPRO | -7.737004 | 340.353 | 6.904  | 614.156 | 118.226 | 161.242 | 288.121 | 46.567 | 1066.502 | 2 | 5    | 3.018 | -4.248 | -4.338 | -2.605 | 49.446  | 68.072  | -2.996 | -0.189 | 73.4   | 0 | 0 |
|  | MPRO | -7.733552 | 405.443 | 10.121 | 666.025 | 249.499 | 112.969 | 267.325 | 36.231 | 1207.998 | 1 | 9.7  | 2.468 | -4.32  | -4.454 | -5.661 | 840.653 | 647.657 | -2.276 | -0.193 | 96.45  | 0 | 0 |
|  | ACE2 | -7.733448 | 449.613 | 6.37   | 833.552 | 419.838 | 59.235  | 309.305 | 45.174 | 1483.515 | 1 | 10   | 2.879 | -2.973 | -2.218 | -9.155 | 42.157  | 38.646  | -4.975 | 0.288  | 79.95  | 0 | 1 |

|                                                                                     |      |           |         |       |         |        |         |         |         |          |   |      |       |        |        |        |          |          |        |       |        |   |   |
|-------------------------------------------------------------------------------------|------|-----------|---------|-------|---------|--------|---------|---------|---------|----------|---|------|-------|--------|--------|--------|----------|----------|--------|-------|--------|---|---|
|                                                                                     |      |           |         |       |         |        |         |         |         |          |   |      |       |        |        |        |          |          |        |       |        |   |   |
| 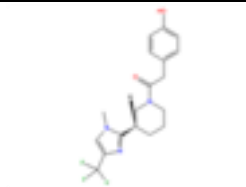   | MPRO | -7.722702 | 367.37  | 9.205 | 641.662 | 235.1  | 89.515  | 192.709 | 124.338 | 1126.465 | 1 | 5.25 | 3.605 | -5.322 | -4.638 | -4.055 | 938.696  | 3422.959 | -2.202 | 0.205 | 58.36  | 0 | 0 |
|    | MPRO | -7.721882 | 371.435 | 5.18  | 704.332 | 396.58 | 89.192  | 218.559 | 0       | 1247.181 | 3 | 6    | 3.278 | -5.059 | -4.325 | -4.508 | 1074.599 | 718.75   | -1.721 | 0.1   | 88.69  | 0 | 0 |
|  | MPRO | -7.719529 | 458.537 | 5.482 | 785.56  | 99.541 | 127.197 | 520.976 | 37.845  | 1416.444 | 2 | 7.5  | 4.757 | -6.586 | -6.866 | -7.634 | 616.158  | 472.443  | -1.26  | 0.6   | 117.45 | 0 | 1 |
|  | MPRO | -7.719031 | 282.273 | 1.681 | 538.212 | 13.254 | 172.139 | 305.989 | 46.83   | 890.268  | 2 | 4    | 2.367 | -4.122 | -4.191 | -5.717 | 230.945  | 183.194  | -3.23  | 0.049 | 65.72  | 0 | 0 |

|                                                                                     |      |           |         |        |         |         |         |         |        |          |   |      |       |        |        |        |         |        |        |        |        |   |   |
|-------------------------------------------------------------------------------------|------|-----------|---------|--------|---------|---------|---------|---------|--------|----------|---|------|-------|--------|--------|--------|---------|--------|--------|--------|--------|---|---|
|                                                                                     |      |           |         |        |         |         |         |         |        |          |   |      |       |        |        |        |         |        |        |        |        |   |   |
| 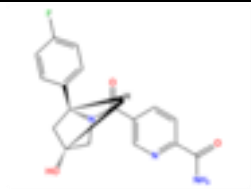   | MPRO | -7.718797 | 329.33  | 6.441  | 577.401 | 93.792  | 209.559 | 227.235 | 46.814 | 1008.441 | 3 | 8.2  | 1.067 | -3.835 | -3.463 | -5.168 | 102.012 | 75.73  | -4.293 | -0.263 | 96.52  | 0 | 0 |
|    | MPRO | -7.715121 | 479.553 | 7.166  | 825.841 | 155.654 | 232.44  | 436.998 | 0.749  | 1467.432 | 3 | 10.5 | 2.738 | -6.392 | -5.754 | -7.561 | 61.897  | 24.683 | -3.688 | 0.215  | 135.77 | 0 | 1 |
|  | MPRO | -7.71278  | 462.522 | 7.779  | 767.028 | 132.965 | 207.575 | 424.729 | 1.759  | 1386.042 | 3 | 9    | 3.024 | -5.735 | -6.248 | -7.056 | 106.529 | 44.957 | -3.177 | 0.264  | 132.53 | 0 | 1 |
|  | MPRO | -7.712632 | 374.442 | 10.862 | 585.166 | 340.07  | 147.588 | 97.508  | 0      | 1114.508 | 1 | 9.5  | 0.3   | -1.334 | -2.041 | -3.155 | 81.011  | 44.671 | -5.575 | -0.66  | 96.23  | 0 | 0 |

|                                                                                    |      |           |         |        |         |         |         |         |        |          |   |     |       |        |        |        |         |         |        |        |        |   |   |
|------------------------------------------------------------------------------------|------|-----------|---------|--------|---------|---------|---------|---------|--------|----------|---|-----|-------|--------|--------|--------|---------|---------|--------|--------|--------|---|---|
|                                                                                    |      |           |         |        |         |         |         |         |        |          |   |     |       |        |        |        |         |         |        |        |        |   |   |
| 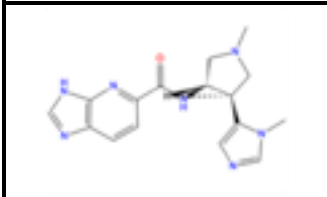   | ACE2 | -7.71168  | 325.372 | 8.665  | 607.257 | 228.571 | 150.383 | 228.303 | 0      | 1053.558 | 2 | 8.5 | 1.007 | -2.905 | -2.366 | -6.185 | 92.623  | 41.819  | -5.357 | -0.193 | 91.73  | 0 | 0 |
|    | MPRO | -7.711375 | 353.398 | 12.99  | 595.916 | 82.738  | 181.553 | 297.497 | 34.128 | 1041.951 | 3 | 6   | 2.209 | -4.404 | -4.977 | -5.635 | 188.034 | 124.98  | -3.433 | 0.07   | 120.87 | 0 | 0 |
|  | MPRO | -7.708583 | 368.438 | 6.662  | 665.965 | 331.611 | 109.049 | 225.304 | 0      | 1192.979 | 1 | 8   | 2.299 | -4.794 | -3.608 | -4.196 | 763.657 | 449.829 | -2.544 | -0.129 | 83.36  | 0 | 0 |
|  | MPRO | -7.706308 | 453.512 | 10.696 | 793.021 | 126.488 | 207.998 | 456.744 | 1.792  | 1382.104 | 3 | 10  | 2.613 | -5.693 | -5.514 | -7.648 | 105.55  | 44.529  | -2.976 | 0.009  | 125.89 | 0 | 1 |

|                                                                                    |      |           |         |        |         |         |         |         |        |          |   |      |       |        |        |        |         |         |        |        |        |   |   |
|------------------------------------------------------------------------------------|------|-----------|---------|--------|---------|---------|---------|---------|--------|----------|---|------|-------|--------|--------|--------|---------|---------|--------|--------|--------|---|---|
|                                                                                    |      |           |         |        |         |         |         |         |        |          |   |      |       |        |        |        |         |         |        |        |        |   |   |
| 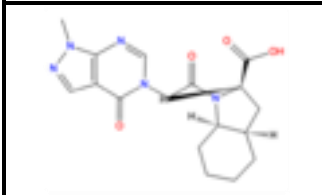   | MPRO | -7.705968 | 359.384 | 9.903  | 608.123 | 319.976 | 194.655 | 93.493  | 0      | 1090.383 | 1 | 10   | 0.621 | -2.35  | -2.463 | -1.345 | 23.755  | 17.194  | -4.49  | -0.973 | 110.32 | 0 | 0 |
|    | MPRO | -7.705485 | 358.827 | 10.499 | 655.567 | 162.237 | 151.169 | 270.574 | 71.587 | 1121.764 | 3 | 6.5  | 2.327 | -4.027 | -3.681 | -6.842 | 91.047  | 101.268 | -4.935 | 0.114  | 80.99  | 0 | 0 |
|  | MPRO | -7.703882 | 382.414 | 6.119  | 641.936 | 133.215 | 116.833 | 316.852 | 75.037 | 1159.476 | 1 | 5.5  | 4.11  | -5.633 | -5.989 | -5.77  | 772.63  | 964.522 | -2.173 | 0.53   | 102.93 | 0 | 0 |
|  | MPRO | -7.70219  | 427.462 | 10.385 | 772.394 | 123.807 | 154.469 | 494.118 | 0      | 1364.896 | 2 | 7.75 | 3.965 | -6.435 | -6.152 | -7.603 | 339.683 | 153.991 | -2.05  | 0.498  | 98.14  | 0 | 1 |

|                                                                                     |      |           |         |       |         |         |         |         |         |          |      |      |       |        |        |        |         |         |        |        |        |   |   |
|-------------------------------------------------------------------------------------|------|-----------|---------|-------|---------|---------|---------|---------|---------|----------|------|------|-------|--------|--------|--------|---------|---------|--------|--------|--------|---|---|
|                                                                                     |      |           |         |       |         |         |         |         |         |          |      |      |       |        |        |        |         |         |        |        |        |   |   |
| 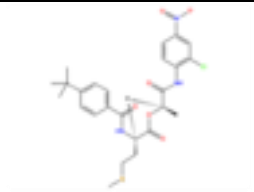   | MPRO | -7.697784 | 536.041 | 9.034 | 912.128 | 438.627 | 161.984 | 209.519 | 101.998 | 1656.122 | 1.25 | 7.75 | 5.885 | -8.546 | -7.72  | -6.703 | 288.274 | 466.885 | -2.711 | 1.067  | 152.94 | 2 | 1 |
|    | ACE2 | -7.696227 | 347.413 | 8.401 | 659.725 | 352.725 | 173.678 | 133.322 | 0       | 1163.224 | 1    | 7    | 0.715 | -4.181 | -2.415 | -4.148 | 14.106  | 6.957   | -5.737 | -0.018 | 98.74  | 0 | 1 |
|  | ACE2 | -7.695058 | 354.426 | 5.916 | 637.721 | 102.588 | 151.648 | 357.405 | 26.081  | 1119.377 | 2.25 | 6.25 | 2.374 | -3.588 | -4.144 | -4.814 | 191.707 | 228.706 | -2.479 | -0.159 | 115.31 | 0 | 0 |
|  | MPRO | -7.693111 | 333.173 | 4.637 | 561.182 | 2.457   | 172.014 | 275.772 | 110.939 | 946.309  | 2    | 4    | 2.924 | -4.794 | -5.197 | -5.587 | 231.575 | 412.458 | -3.334 | 0.193  | 65.72  | 0 | 0 |

|                                                                                     |      |           |         |        |         |         |         |         |        |          |   |      |       |        |        |        |         |         |        |        |        |   |   |
|-------------------------------------------------------------------------------------|------|-----------|---------|--------|---------|---------|---------|---------|--------|----------|---|------|-------|--------|--------|--------|---------|---------|--------|--------|--------|---|---|
|                                                                                     |      |           |         |        |         |         |         |         |        |          |   |      |       |        |        |        |         |         |        |        |        |   |   |
| 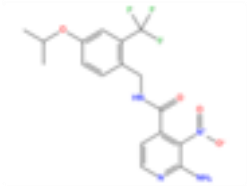   | MPRO | -7.691484 | 398.341 | 7.844  | 636.227 | 209.188 | 161.294 | 170.393 | 95.352 | 1134.016 | 3 | 5.75 | 3.135 | -4.899 | -5.58  | -5.15  | 292.651 | 436.391 | -3.22  | 0.199  | 120.38 | 0 | 0 |
|    | MPRO | -7.69133  | 477.537 | 13.002 | 851.627 | 205.432 | 196.557 | 400.495 | 49.144 | 1491.333 | 3 | 9.5  | 3.026 | -5.985 | -5.583 | -6.254 | 69.815  | 105.998 | -3.059 | 0.071  | 155.22 | 0 | 2 |
|  | MPRO | -7.691032 | 474.571 | 7.282  | 876.721 | 348.263 | 220.409 | 306.266 | 1.784  | 1549.425 | 2 | 8.75 | 3.383 | -6.658 | -5.37  | -5.848 | 53.378  | 33.218  | -3.639 | 0.314  | 130.18 | 0 | 1 |
|  | ACE2 | -7.690945 | 329.831 | 5.461  | 606.775 | 270.368 | 87.972  | 177.043 | 71.392 | 1060.769 | 1 | 7.5  | 1.628 | -2.844 | -2.554 | -6.596 | 90.253  | 110.705 | -6.258 | -0.127 | 55.19  | 0 | 0 |

|                                                                                     |      |           |         |       |         |         |         |         |   |          |      |      |       |        |        |        |          |         |        |        |        |   |   |
|-------------------------------------------------------------------------------------|------|-----------|---------|-------|---------|---------|---------|---------|---|----------|------|------|-------|--------|--------|--------|----------|---------|--------|--------|--------|---|---|
|                                                                                     |      |           |         |       |         |         |         |         |   |          |      |      |       |        |        |        |          |         |        |        |        |   |   |
| 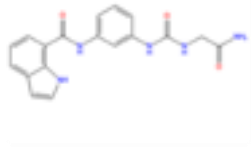   | MPRO | -7.68726  | 351.364 | 6.062 | 652.633 | 49.503  | 232.715 | 370.415 | 0 | 1102.321 | 4.25 | 5.25 | 0.963 | -3.037 | -3.597 | -3.936 | 21.062   | 24.292  | -4.024 | -0.508 | 129.11 | 1 | 1 |
|    | MPRO | -7.687013 | 454.527 | 6.284 | 796.525 | 240.066 | 78.623  | 477.835 | 0 | 1451.944 | 0    | 8.25 | 4.765 | -6.34  | -6.263 | -7.395 | 1779.568 | 922.381 | -0.901 | 0.456  | 67.67  | 0 | 1 |
|  | MPRO | -7.686286 | 323.394 | 3.516 | 582.998 | 145.747 | 207.06  | 230.192 | 0 | 1037.208 | 4    | 6    | 1.064 | -2.728 | -3.368 | -3.683 | 55.583   | 44.508  | -4.141 | -0.314 | 89.42  | 0 | 1 |
|  | MPRO | -7.685229 | 462.631 | 9.017 | 908.905 | 721.146 | 118.182 | 69.578  | 0 | 1634.911 | 2    | 8.5  | 3.821 | -6.472 | -3.74  | -3.347 | 411.756  | 362.607 | -2.3   | 0.142  | 102.2  | 0 | 1 |



|                                                                                    |      |           |         |        |         |         |         |         |        |          |   |       |       |        |        |        |          |         |        |       |        |   |   |
|------------------------------------------------------------------------------------|------|-----------|---------|--------|---------|---------|---------|---------|--------|----------|---|-------|-------|--------|--------|--------|----------|---------|--------|-------|--------|---|---|
|                                                                                    |      |           |         |        |         |         |         |         |        |          |   |       |       |        |        |        |          |         |        |       |        |   |   |
| 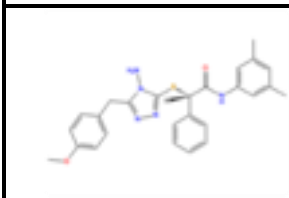   | MPRO | -7.684616 | 473.592 | 12.224 | 686.495 | 235.352 | 95.619  | 323.145 | 32.379 | 1372.545 | 3 | 7.25  | 3.944 | -3.51  | -6.131 | -5.902 | 306.229  | 229.129 | -3.342 | 0.52  | 120.36 | 0 | 1 |
|    | MPRO | -7.680547 | 388.465 | 5.282  | 658.355 | 208.447 | 81.163  | 368.745 | 0      | 1231.156 | 2 | 5.95  | 4.267 | -5.075 | -5.742 | -5.818 | 1683.579 | 868.723 | -1.14  | 0.53  | 71.45  | 0 | 1 |
|  | MPRO | -7.679692 | 331.416 | 4.881  | 612.951 | 198.585 | 100.407 | 313.959 | 0      | 1094.571 | 2 | 3.5   | 3.537 | -4.607 | -4.496 | -4.276 | 731.651  | 551.609 | -1.88  | 0.348 | 57.78  | 0 | 0 |
|  | ACE2 | -7.6796   | 420.569 | 8.429  | 751.077 | 517.755 | 106.653 | 77.15   | 49.52  | 1350.484 | 2 | 10.65 | 1.696 | -2.55  | -2.046 | -6.804 | 60.022   | 54.06   | -6.57  | -0.15 | 98.12  | 0 | 0 |

|                                                                                     |      |           |         |        |         |         |         |         |        |          |   |     |       |        |        |        |         |          |        |        |        |   |   |
|-------------------------------------------------------------------------------------|------|-----------|---------|--------|---------|---------|---------|---------|--------|----------|---|-----|-------|--------|--------|--------|---------|----------|--------|--------|--------|---|---|
|                                                                                     |      |           |         |        |         |         |         |         |        |          |   |     |       |        |        |        |         |          |        |        |        |   |   |
| 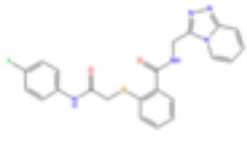   | MPRO | -7.678648 | 435.475 | 12.089 | 601.136 | 68.45   | 115.344 | 338.115 | 79.227 | 1174.825 | 2 | 7.5 | 3.39  | -3.848 | -6.286 | -4.832 | 798.158 | 1053.236 | -1.782 | 0.121  | 114.21 | 0 | 0 |
|    | MPRO | -7.677514 | 394.386 | 9.404  | 592.3   | 148.222 | 183.342 | 260.736 | 0      | 1110.146 | 3 | 8.5 | 1.012 | -2.506 | -4.232 | -3.417 | 106.826 | 77.901   | -3.5   | -0.443 | 125.54 | 0 | 0 |
|  | MPRO | -7.676844 | 332.349 | 6.069  | 576.207 | 124.799 | 150.994 | 236.398 | 64.017 | 1016.877 | 3 | 6.2 | 1.786 | -2.957 | -3.142 | -5.833 | 91.396  | 92.427   | -5.148 | -0.004 | 66.56  | 0 | 0 |
|  | MPRO | -7.675123 | 327.385 | 8.976  | 606.39  | 284.648 | 161.383 | 160.358 | 0      | 1072.389 | 1 | 7.5 | 1.333 | -3.531 | -2.768 | -3.583 | 191.761 | 130.805  | -3.737 | -0.33  | 83.88  | 0 | 0 |

|                                                                                     |      |           |         |        |         |         |         |         |        |          |   |      |       |        |        |        |          |          |        |        |        |   |   |
|-------------------------------------------------------------------------------------|------|-----------|---------|--------|---------|---------|---------|---------|--------|----------|---|------|-------|--------|--------|--------|----------|----------|--------|--------|--------|---|---|
|                                                                                     |      |           |         |        |         |         |         |         |        |          |   |      |       |        |        |        |          |          |        |        |        |   |   |
| 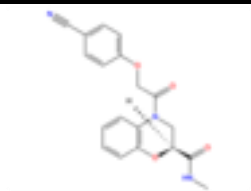   | MPRO | -7.673447 | 351.361 | 2.092  | 656.987 | 156.304 | 162.728 | 337.955 | 0      | 1124.803 | 1 | 8.5  | 1.412 | -4.302 | -4.168 | -5.068 | 155.036  | 126.719  | -2.848 | -0.548 | 91.66  | 0 | 0 |
|    | ACE2 | -7.671655 | 373.41  | 3.101  | 700.931 | 71.285  | 70.489  | 559.157 | 0      | 1220.85  | 1 | 6.45 | 4.394 | -5.501 | -5.488 | -7.627 | 2125.441 | 1117.593 | -0.177 | 0.354  | 65.38  | 0 | 0 |
|  | ACE2 | -7.670744 | 398.423 | 10.532 | 620.866 | 80.4    | 88.23   | 452.236 | 0      | 1178.466 | 1 | 6.75 | 3.797 | -4.157 | -6.051 | -5.808 | 1442.832 | 735.264  | -0.976 | 0.266  | 86.86  | 0 | 0 |
|  | ACE2 | -7.666898 | 417.851 | 12.393 | 744.554 | 229.667 | 205.403 | 237.993 | 71.491 | 1268.058 | 4 | 9.75 | 1.385 | -4.186 | -3.596 | -7.261 | 27.859   | 28.122   | -5.857 | -0.209 | 119.32 | 0 | 0 |

|                                                                                     |      |           |         |        |         |         |         |         |        |          |   |      |       |        |        |        |         |         |        |        |       |   |   |
|-------------------------------------------------------------------------------------|------|-----------|---------|--------|---------|---------|---------|---------|--------|----------|---|------|-------|--------|--------|--------|---------|---------|--------|--------|-------|---|---|
|                                                                                     |      |           |         |        |         |         |         |         |        |          |   |      |       |        |        |        |         |         |        |        |       |   |   |
| 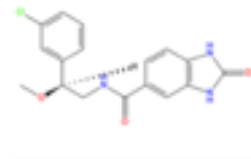   | MPRO | -7.666192 | 345.785 | 2.153  | 622.361 | 125.568 | 166.817 | 258.391 | 71.585 | 1062.755 | 3 | 6.2  | 2.496 | -4.783 | -4.583 | -5.851 | 259.404 | 283.836 | -3.204 | 0.026  | 86.98 | 0 | 0 |
|    | ACE2 | -7.666059 | 291.78  | 1.81   | 542.156 | 251.874 | 58.698  | 168.294 | 63.289 | 934.36   | 1 | 5.75 | 1.739 | -1.487 | -1.484 | -6.173 | 171.028 | 199.455 | -5.846 | -0.06  | 39.6  | 0 | 0 |
|  | MPRO | -7.658907 | 325.366 | 8.069  | 605.009 | 173.041 | 165.934 | 266.034 | 0      | 1046.745 | 3 | 6.75 | 1.332 | -3.203 | -3.304 | -4.273 | 150.318 | 117.483 | -3.256 | -0.357 | 84.66 | 0 | 0 |
|  | MPRO | -7.656709 | 424.474 | 11.708 | 749.166 | 297.504 | 140.838 | 274.251 | 36.573 | 1349.659 | 3 | 6.75 | 4.092 | -6.417 | -6.033 | -6.264 | 457.442 | 336.947 | -2.573 | 0.598  | 99.24 | 0 | 1 |

|                                                                                     |      |           |         |       |         |         |         |         |        |          |   |      |       |        |        |        |         |         |        |       |        |   |   |
|-------------------------------------------------------------------------------------|------|-----------|---------|-------|---------|---------|---------|---------|--------|----------|---|------|-------|--------|--------|--------|---------|---------|--------|-------|--------|---|---|
|                                                                                     |      |           |         |       |         |         |         |         |        |          |   |      |       |        |        |        |         |         |        |       |        |   |   |
| 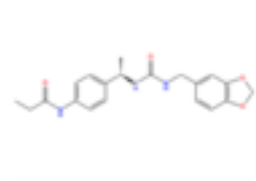   | MPRO | -7.656456 | 369.419 | 9.11  | 690.427 | 354.514 | 92.783  | 243.13  | 0      | 1198.026 | 3 | 6    | 2.974 | -4.927 | -4.401 | -4.713 | 960.754 | 660.349 | -1.797 | 0.013 | 88.69  | 0 | 0 |
|    | MPRO | -7.656212 | 438.457 | 7.479 | 770.462 | 139.213 | 161.181 | 423.258 | 46.81  | 1374.632 | 2 | 6.75 | 3.859 | -5.26  | -5.814 | -5.8   | 165.446 | 237.205 | -2.039 | 0.224 | 116.31 | 0 | 0 |
|  | MPRO | -7.654702 | 380.489 | 8.888 | 685.561 | 357.053 | 136.01  | 192.497 | 0      | 1251.623 | 4 | 6    | 2.873 | -3.851 | -4.171 | -6.1   | 126.769 | 58.708  | -4.739 | 0.369 | 89.78  | 0 | 0 |
|  | MPRO | -7.652268 | 356.399 | 6.643 | 634.667 | 162.608 | 146.976 | 302.414 | 22.669 | 1112.046 | 3 | 5.5  | 2.436 | -4.786 | -3.883 | -4.546 | 279.61  | 244.613 | -2.971 | 0.065 | 78.67  | 0 | 0 |

|                                                                                     |      |           |         |        |         |         |         |         |        |          |   |      |       |        |        |        |          |         |        |        |        |   |   |
|-------------------------------------------------------------------------------------|------|-----------|---------|--------|---------|---------|---------|---------|--------|----------|---|------|-------|--------|--------|--------|----------|---------|--------|--------|--------|---|---|
|                                                                                     |      |           |         |        |         |         |         |         |        |          |   |      |       |        |        |        |          |         |        |        |        |   |   |
| 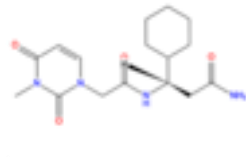   | MPRO | -7.651972 | 336.39  | 9.364  | 627.727 | 352.55  | 205.489 | 69.688  | 0      | 1104.11  | 2 | 7.5  | 0.404 | -2.511 | -2.148 | -1.979 | 46.379   | 46.189  | -4.485 | -0.718 | 116.19 | 0 | 0 |
|    | MPRO | -7.65138  | 279.298 | 10.007 | 531.598 | 0       | 179.332 | 352.266 | 0      | 892.665  | 3 | 4    | 2.021 | -3.806 | -4.038 | -5.746 | 197.376  | 85.634  | -3.296 | 0.023  | 87.98  | 0 | 0 |
|  | ACE2 | -7.649969 | 345.459 | 6.911  | 664.26  | 282.187 | 57.266  | 278.801 | 46.006 | 1152.776 | 1 | 7.25 | 2.521 | -2.483 | -2.019 | -7.543 | 176.46   | 165.9   | -5.142 | 0.059  | 73.05  | 0 | 0 |
|  | MPRO | -7.648012 | 381.492 | 4.467  | 716.141 | 374.917 | 45.049  | 260.817 | 35.358 | 1261.151 | 1 | 5    | 4.601 | -6.037 | -5.349 | -4.827 | 2647.418 | 3182.29 | -0.855 | 0.483  | 92.35  | 0 | 2 |

|                                                                                     |      |           |         |        |         |         |         |         |         |          |      |       |       |        |        |        |         |          |        |        |        |   |   |
|-------------------------------------------------------------------------------------|------|-----------|---------|--------|---------|---------|---------|---------|---------|----------|------|-------|-------|--------|--------|--------|---------|----------|--------|--------|--------|---|---|
|                                                                                     |      |           |         |        |         |         |         |         |         |          |      |       |       |        |        |        |         |          |        |        |        |   |   |
| 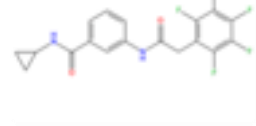   | MPRO | -7.647161 | 384.305 | 8      | 658.376 | 193.635 | 83.48   | 190.444 | 190.817 | 1113.435 | 2    | 5     | 4.374 | -6.364 | -5.479 | -5.853 | 1600.51 | 9129.024 | -1.907 | 0.397  | 58.2   | 0 | 1 |
|    | MPRO | -7.646959 | 478.565 | 9.25   | 803.954 | 232.14  | 129.083 | 441.023 | 1.708   | 1482.631 | 2    | 8.5   | 4.521 | -6.235 | -6.816 | -7.16  | 591.294 | 286.452  | -1.481 | 0.545  | 114.61 | 0 | 1 |
|  | MPRO | -7.6444   | 358.439 | 12.698 | 647.645 | 402.822 | 161.028 | 83.794  | 0       | 1163.509 | 2.25 | 6.75  | 1.35  | -3.748 | -3.077 | -1.997 | 150.131 | 131.904  | -3.808 | -0.361 | 90.54  | 0 | 0 |
|  | MPRO | -7.644347 | 494.564 | 9.01   | 764.625 | 293.89  | 180.772 | 288.301 | 1.661   | 1429.814 | 2    | 11.75 | 2.358 | -4.629 | -5.722 | -6.099 | 191.265 | 84.524   | -3.067 | -0.141 | 126.08 | 0 | 0 |

|                                                                                    |      |           |         |       |         |         |         |         |        |          |   |     |       |        |        |        |         |         |        |        |        |   |   |
|------------------------------------------------------------------------------------|------|-----------|---------|-------|---------|---------|---------|---------|--------|----------|---|-----|-------|--------|--------|--------|---------|---------|--------|--------|--------|---|---|
|                                                                                    |      |           |         |       |         |         |         |         |        |          |   |     |       |        |        |        |         |         |        |        |        |   |   |
| 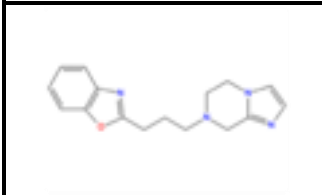   | ACE2 | -7.644226 | 282.344 | 3.216 | 565.84  | 213.409 | 57.898  | 294.533 | 0      | 959.938  | 0 | 5.5 | 2.296 | -2.189 | -2.354 | -6.386 | 697.843 | 370.98  | -3.228 | -0.236 | 47.09  | 0 | 0 |
|    | ACE2 | -7.643808 | 373.429 | 8.618 | 667.723 | 237.015 | 204.618 | 179.279 | 46.811 | 1187.274 | 3 | 9   | 0.614 | -1.991 | -2.306 | -4.779 | 15.07   | 20.984  | -6.05  | -0.503 | 95.32  | 0 | 1 |
|  | MPRO | -7.643129 | 453.487 | 8.079 | 764.445 | 148.25  | 149.1   | 419.599 | 47.496 | 1343.872 | 1 | 9   | 3.543 | -6.159 | -5.994 | -7.248 | 381.931 | 318.205 | -2.309 | 0.225  | 103.96 | 0 | 1 |
|  | MPRO | -7.642768 | 377.46  | 8.669 | 654.212 | 151.495 | 138.045 | 332.444 | 32.228 | 1166.327 | 2 | 6.5 | 3.319 | -5.302 | -5.269 | -6.045 | 486.206 | 340.711 | -2.509 | 0.335  | 101.59 | 0 | 0 |



|                                                                                    |      |           |         |       |         |         |         |         |        |          |      |      |       |        |        |        |         |          |        |        |        |   |   |
|------------------------------------------------------------------------------------|------|-----------|---------|-------|---------|---------|---------|---------|--------|----------|------|------|-------|--------|--------|--------|---------|----------|--------|--------|--------|---|---|
|                                                                                    |      |           |         |       |         |         |         |         |        |          |      |      |       |        |        |        |         |          |        |        |        |   |   |
| 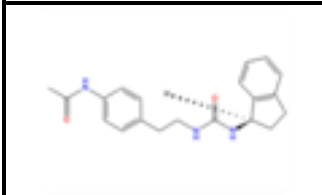   | MPRO | -7.640749 | 337.421 | 9.05  | 699.034 | 267.344 | 128.045 | 303.645 | 0      | 1186.005 | 3    | 4.5  | 3.28  | -5.013 | -4.164 | -5.244 | 312.938 | 287.302  | -2.33  | 0.252  | 70.23  | 0 | 0 |
|    | MPRO | -7.640353 | 444.489 | 4.559 | 827.037 | 182.662 | 149.247 | 495.128 | 0      | 1444.721 | 1.5  | 7.5  | 4.658 | -7.168 | -6.311 | -7.982 | 380.708 | 174.189  | -1.758 | 0.671  | 116.4  | 0 | 1 |
|  | MPRO | -7.638746 | 464.581 | 7.858 | 778.65  | 218.336 | 130.147 | 428.737 | 1.429  | 1441.32  | 1.25 | 7.75 | 4.024 | -5.318 | -6.042 | -5.56  | 381.858 | 278.371  | -1.544 | 0.277  | 101.47 | 0 | 0 |
|  | MPRO | -7.637594 | 416.86  | 5.322 | 647.227 | 274.53  | 110.899 | 190.263 | 71.534 | 1195.151 | 2    | 7.75 | 2.572 | -4.159 | -4.793 | -3.63  | 516.907 | 1061.559 | -2.509 | -0.112 | 91.09  | 0 | 0 |

|                                                                                     |      |           |         |        |         |         |         |         |        |          |      |       |       |        |        |        |         |         |        |        |        |   |   |
|-------------------------------------------------------------------------------------|------|-----------|---------|--------|---------|---------|---------|---------|--------|----------|------|-------|-------|--------|--------|--------|---------|---------|--------|--------|--------|---|---|
|                                                                                     |      |           |         |        |         |         |         |         |        |          |      |       |       |        |        |        |         |         |        |        |        |   |   |
| 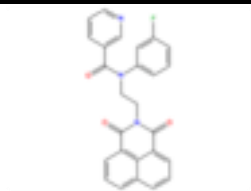   | MPRO | -7.63636  | 439.445 | 5.491  | 705.235 | 38.46   | 118.946 | 500.971 | 46.858 | 1290.563 | 0    | 7.5   | 4.004 | -5.045 | -6.425 | -6.949 | 737.792 | 643.116 | -1.467 | 0.146  | 70.58  | 0 | 0 |
|    | MPRO | -7.636072 | 539.354 | 11.601 | 684.276 | 226.477 | 238.429 | 181.75  | 37.62  | 1307.463 | 1.25 | 10.75 | 1.7   | -3.671 | -6.789 | -4.906 | 54.309  | 34.118  | -4.505 | -0.271 | 149.39 | 1 | 0 |
|  | MPRO | -7.635464 | 635.838 | 3.262  | 909.605 | 439.204 | 112.635 | 331.755 | 26.01  | 1858.157 | 2    | 9.75  | 6.45  | -7.058 | -9.552 | -6.292 | 846.804 | 573.822 | -1.179 | 1.14   | 148.89 | 2 | 1 |
|  | MPRO | -7.632684 | 366.44  | 13.855 | 613.567 | 194.938 | 102.13  | 270.949 | 45.551 | 1114.831 | 1    | 6.5   | 2.731 | -3.776 | -4.507 | -3.918 | 788     | 940.809 | -1.871 | -0.186 | 102.93 | 0 | 0 |

|                                                                                     |      |           |         |       |         |         |         |         |         |          |   |      |       |        |        |        |          |          |        |       |        |   |   |
|-------------------------------------------------------------------------------------|------|-----------|---------|-------|---------|---------|---------|---------|---------|----------|---|------|-------|--------|--------|--------|----------|----------|--------|-------|--------|---|---|
|                                                                                     |      |           |         |       |         |         |         |         |         |          |   |      |       |        |        |        |          |          |        |       |        |   |   |
| 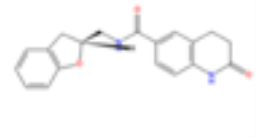   | MPRO | -7.632513 | 322.363 | 6.037 | 619.585 | 204.565 | 122.77  | 292.249 | 0       | 1053.71  | 2 | 5.75 | 2.844 | -4.968 | -4.338 | -6.028 | 678.691  | 325.392  | -2.465 | 0.211 | 67.43  | 0 | 0 |
|    | MPRO | -7.629789 | 446.523 | 9.8   | 763.058 | 89.696  | 186.087 | 485.463 | 1.813   | 1359.408 | 3 | 8    | 3.461 | -6.293 | -6.367 | -7.443 | 170.309  | 74.704   | -2.759 | 0.445 | 115.46 | 0 | 1 |
|  | MPRO | -7.629347 | 486.587 | 4.686 | 719.797 | 258.651 | 57.297  | 369.96  | 33.89   | 1412.228 | 1 | 7.75 | 5.078 | -5.808 | -7.43  | -5.793 | 2835.021 | 2339.698 | -0.792 | 0.715 | 101.76 | 1 | 1 |
|  | MPRO | -7.628686 | 500.427 | 8.774 | 795.002 | 277.991 | 94.03   | 293.068 | 129.913 | 1469.357 | 1 | 8    | 4.167 | -5.822 | -5.527 | -5.74  | 231.049  | 814.054  | -3.899 | 0.504 | 70.47  | 1 | 1 |

|                                                                                     |      |           |         |        |         |         |         |         |        |          |   |     |       |        |        |        |         |          |        |        |        |   |   |
|-------------------------------------------------------------------------------------|------|-----------|---------|--------|---------|---------|---------|---------|--------|----------|---|-----|-------|--------|--------|--------|---------|----------|--------|--------|--------|---|---|
|                                                                                     |      |           |         |        |         |         |         |         |        |          |   |     |       |        |        |        |         |          |        |        |        |   |   |
| 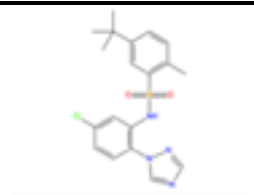   | MPRO | -7.628456 | 404.913 | 3.533  | 670.678 | 250.817 | 105.721 | 242.455 | 71.685 | 1217.916 | 1 | 7   | 3.821 | -5.564 | -5.662 | -5.563 | 984.799 | 1201.851 | -2.23  | 0.379  | 85.26  | 0 | 0 |
|    | MPRO | -7.626542 | 326.351 | 9.225  | 583.801 | 175.772 | 154.867 | 253.163 | 0      | 1029.201 | 3 | 6.5 | 2.024 | -3.786 | -4.111 | -5.257 | 336.74  | 152.55   | -3.002 | -0.063 | 87.66  | 0 | 0 |
|  | ACE2 | -7.627306 | 367.407 | 6.2    | 668.655 | 302.175 | 169.035 | 197.445 | 0      | 1163.719 | 2 | 8.7 | 1.401 | -3.336 | -3.141 | -6.433 | 61.638  | 26.928   | -5.522 | -0.115 | 103.11 | 0 | 0 |
|  | MPRO | -7.623766 | 455.484 | 10.128 | 780.429 | 203.448 | 150.466 | 424.753 | 1.762  | 1372.219 | 2 | 9   | 3.451 | -5.663 | -5.924 | -7.357 | 370.705 | 173.05   | -1.932 | 0.15   | 123.7  | 0 | 0 |

|                                                                                     |      |           |         |       |         |         |         |         |         |          |   |      |       |        |        |        |          |         |        |        |       |   |   |
|-------------------------------------------------------------------------------------|------|-----------|---------|-------|---------|---------|---------|---------|---------|----------|---|------|-------|--------|--------|--------|----------|---------|--------|--------|-------|---|---|
|                                                                                     |      |           |         |       |         |         |         |         |         |          |   |      |       |        |        |        |          |         |        |        |       |   |   |
| 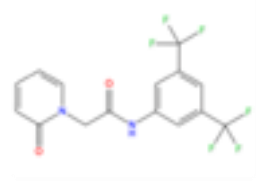   | MPRO | -7.623712 | 364.247 | 9.286 | 583.221 | 42.073  | 79.763  | 227.557 | 233.828 | 986.082  | 1 | 5.5  | 3.775 | -5.461 | -5.141 | -5.506 | 1735.831 | 10000   | -1.9   | 0.106  | 51.1  | 0 | 0 |
|    | ACE2 | -7.623186 | 397.906 | 3.743 | 737.453 | 304.705 | 69.546  | 291.397 | 71.805  | 1288.395 | 1 | 8    | 3.101 | -3.746 | -3.003 | -7.991 | 134.956  | 171.908 | -5.42  | 0.292  | 53.4  | 0 | 0 |
|  | MPRO | -7.620529 | 496.51  | 5.821 | 874.099 | 301.694 | 115.427 | 376.901 | 80.077  | 1557.62  | 1 | 6.75 | 5.535 | -7.546 | -7.052 | -6.106 | 513.824  | 1062.51 | -1.359 | 0.738  | 93.73 | 1 | 1 |
|  | ACE2 | -7.621056 | 287.156 | 3.793 | 491.449 | 204.739 | 94.888  | 114.553 | 77.269  | 815.016  | 2 | 3.75 | 1.91  | -2.147 | -2.784 | -5.092 | 311.158  | 410.661 | -4.447 | -0.133 | 61.36 | 0 | 0 |

|                                                                                    |      |           |         |        |         |         |         |         |         |          |   |      |       |        |        |        |          |          |        |        |        |   |   |
|------------------------------------------------------------------------------------|------|-----------|---------|--------|---------|---------|---------|---------|---------|----------|---|------|-------|--------|--------|--------|----------|----------|--------|--------|--------|---|---|
|                                                                                    |      |           |         |        |         |         |         |         |         |          |   |      |       |        |        |        |          |          |        |        |        |   |   |
| 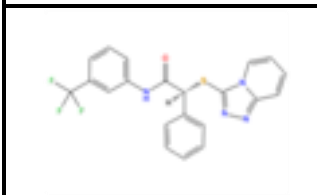   | MPRO | -7.618894 | 428.431 | 12.831 | 686.58  | 2.311   | 82.251  | 454.107 | 147.911 | 1220.296 | 1 | 4.5  | 5.582 | -6.956 | -7.395 | -6.863 | 1644.052 | 5469.964 | -0.956 | 0.844  | 85.11  | 1 | 1 |
|    | MPRO | -7.618535 | 331.312 | 8.148  | 569.568 | 128.101 | 97.689  | 201.918 | 141.861 | 967.555  | 1 | 8    | 2.136 | -2.491 | -3.444 | -5.236 | 46.722   | 3520.506 | -2.225 | -0.458 | 83.2   | 0 | 0 |
|  | MPRO | -7.618485 | 487.631 | 9.997  | 762.087 | 469.506 | 88.389  | 137.735 | 66.456  | 1437.154 | 1 | 5.75 | 5.709 | -6.988 | -7.665 | -5.293 | 1437.825 | 1693.792 | -1.895 | 1.055  | 146.85 | 1 | 1 |
|  | MPRO | -7.617443 | 483.928 | 8.285  | 714.002 | 164.456 | 195.089 | 272.889 | 81.569  | 1316.735 | 1 | 8    | 3.467 | -5.819 | -7.158 | -5.848 | 139.917  | 165.185  | -3.674 | 0.389  | 158.14 | 0 | 1 |

|                                                                                     |      |           |         |        |         |         |         |         |        |          |   |      |       |        |        |        |         |         |        |        |        |   |   |
|-------------------------------------------------------------------------------------|------|-----------|---------|--------|---------|---------|---------|---------|--------|----------|---|------|-------|--------|--------|--------|---------|---------|--------|--------|--------|---|---|
|                                                                                     |      |           |         |        |         |         |         |         |        |          |   |      |       |        |        |        |         |         |        |        |        |   |   |
| 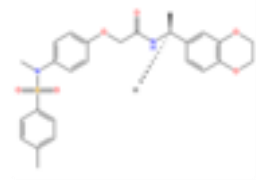   | MPRO | -7.61314  | 496.577 | 11.744 | 827.081 | 399.189 | 110.793 | 315.432 | 1.667  | 1503.15  | 1 | 9.25 | 3.776 | -5.597 | -6.127 | -5.428 | 544.278 | 440.862 | -1.682 | 0.146  | 102.55 | 0 | 0 |
|    | MPRO | -7.608325 | 421.47  | 7.657  | 621.463 | 125.563 | 171.859 | 322.322 | 1.719  | 1194.427 | 1 | 9.25 | 2.138 | -4.105 | -6.145 | -5.075 | 232.36  | 104.391 | -2.879 | -0.225 | 107.88 | 0 | 0 |
|  | MPRO | -7.604902 | 486.605 | 12.202 | 706.68  | 182.236 | 111.177 | 343.467 | 69.799 | 1387.408 | 1 | 9    | 4.128 | -5.77  | -7.739 | -5.576 | 874.187 | 1031.79 | -1.59  | 0.266  | 139.63 | 0 | 1 |
|  | MPRO | -7.60401  | 386.406 | 2.258  | 730.355 | 71.121  | 123.982 | 535.252 | 0      | 1254.76  | 0 | 6.75 | 3.963 | -5.546 | -5.467 | -7.801 | 660.97  | 316.219 | -1.343 | 0.2    | 70.42  | 0 | 0 |

|                                                                                     |      |           |         |       |         |         |         |         |        |          |   |      |       |        |        |        |         |         |        |        |        |   |   |
|-------------------------------------------------------------------------------------|------|-----------|---------|-------|---------|---------|---------|---------|--------|----------|---|------|-------|--------|--------|--------|---------|---------|--------|--------|--------|---|---|
|                                                                                     |      |           |         |       |         |         |         |         |        |          |   |      |       |        |        |        |         |         |        |        |        |   |   |
| 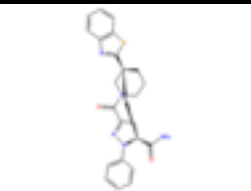   | MPRO | -7.602391 | 433.527 | 6.336 | 689.025 | 205.531 | 161.271 | 286.95  | 35.273 | 1282.043 | 2 | 8    | 2.621 | -3.888 | -5.261 | -4.304 | 104.326 | 204.644 | -3.289 | 0.136  | 120.13 | 0 | 0 |
|    | ACE2 | -7.597419 | 306.425 | 4.515 | 558.609 | 327.043 | 53.294  | 143.885 | 34.386 | 1009.39  | 1 | 6    | 1.913 | -1.537 | -1.898 | -3.655 | 465.553 | 638.117 | -3.577 | -0.31  | 78.4   | 0 | 0 |
|  | ACE2 | -7.596339 | 496.589 | 7.745 | 729.83  | 361.335 | 168.267 | 174.7   | 25.528 | 1409.413 | 1 | 10.5 | 2.325 | -3.664 | -5.313 | -5.794 | 62.68   | 37.836  | -5.588 | 0.128  | 148.06 | 1 | 0 |
|  | ACE2 | -7.596166 | 297.359 | 4.599 | 575.188 | 289.114 | 91.56   | 194.513 | 0      | 996.944  | 0 | 7.7  | 1.116 | -2.377 | -2.468 | -5.79  | 334.607 | 167.614 | -4.296 | -0.675 | 65.28  | 0 | 0 |



|                                                                                     |      |           |         |       |         |         |         |         |         |          |   |     |       |        |        |        |         |         |        |        |        |   |   |
|-------------------------------------------------------------------------------------|------|-----------|---------|-------|---------|---------|---------|---------|---------|----------|---|-----|-------|--------|--------|--------|---------|---------|--------|--------|--------|---|---|
|                                                                                     |      |           |         |       |         |         |         |         |         |          |   |     |       |        |        |        |         |         |        |        |        |   |   |
| 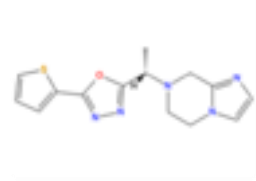   | ACE2 | -7.595696 | 301.365 | 3.195 | 540.394 | 182.326 | 74.845  | 244.748 | 38.475  | 941.944  | 0 | 6   | 1.907 | -1.939 | -2.586 | -5.692 | 482.003 | 404.027 | -3.907 | -0.337 | 88.22  | 0 | 0 |
|    | ACE2 | -7.589474 | 387.456 | 6.406 | 740.969 | 410.574 | 107.058 | 185.033 | 38.303  | 1291.171 | 2 | 8.5 | 2.794 | -4.597 | -3.355 | -6.799 | 238.543 | 188.485 | -4.327 | 0.172  | 79.26  | 0 | 0 |
|  | ACE2 | -7.577509 | 309.729 | 5.758 | 514.303 | 34.1    | 196.191 | 180.307 | 103.705 | 856.468  | 2 | 4.5 | 1.889 | -4.004 | -4.554 | -4.851 | 136.589 | 212.781 | -4.212 | -0.06  | 121.73 | 0 | 0 |
|  | ACE2 | -7.57716  | 272.346 | 6.188 | 591.843 | 312.827 | 62.633  | 216.383 | 0       | 992.623  | 2 | 4.5 | 2.75  | -3.315 | -2.542 | -6.314 | 629.294 | 331.753 | -3.494 | 0.18   | 54.27  | 0 | 1 |

|                                                                                     |      |           |         |       |         |         |         |         |        |          |   |      |        |        |        |        |         |         |        |        |        |   |   |
|-------------------------------------------------------------------------------------|------|-----------|---------|-------|---------|---------|---------|---------|--------|----------|---|------|--------|--------|--------|--------|---------|---------|--------|--------|--------|---|---|
|                                                                                     |      |           |         |       |         |         |         |         |        |          |   |      |        |        |        |        |         |         |        |        |        |   |   |
| 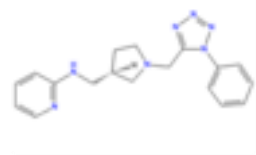   | ACE2 | -7.576307 | 335.411 | 7.971 | 658.187 | 173.14  | 111.81  | 373.237 | 0      | 1136.329 | 1 | 6.5  | 2.817  | -3.839 | -3.462 | -7.272 | 215.035 | 103.933 | -3.848 | 0.209  | 71.76  | 0 | 0 |
|    | ACE2 | -7.566398 | 235.288 | 5.279 | 500.875 | 261.033 | 99.389  | 140.454 | 0      | 834.655  | 1 | 9    | -0.723 | 0.536  | 1.008  | -5.985 | 70.339  | 34.361  | -6.694 | -0.899 | 61.36  | 0 | 0 |
|  | ACE2 | -7.566234 | 299.372 | 4.94  | 615.219 | 307.07  | 85.933  | 222.216 | 0      | 1052.253 | 2 | 5.75 | 2.485  | -3.187 | -2.689 | -6.34  | 378.353 | 191.42  | -3.807 | 0.084  | 63.25  | 0 | 1 |
|  | ACE2 | -7.550276 | 323.314 | 3.102 | 542.239 | 232.313 | 211.152 | 41.781  | 56.993 | 914.192  | 4 | 9    | -0.573 | -1.87  | -1.594 | -5.045 | 24.572  | 20.451  | -6.942 | -0.605 | 122.81 | 0 | 0 |

|                                                                                     |      |           |         |       |         |         |         |         |        |          |      |      |       |        |        |        |         |         |        |        |        |   |   |
|-------------------------------------------------------------------------------------|------|-----------|---------|-------|---------|---------|---------|---------|--------|----------|------|------|-------|--------|--------|--------|---------|---------|--------|--------|--------|---|---|
|                                                                                     |      |           |         |       |         |         |         |         |        |          |      |      |       |        |        |        |         |         |        |        |        |   |   |
| 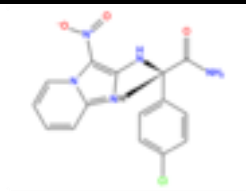   | ACE2 | -7.548985 | 345.744 | 8.065 | 557.782 | 0       | 185.378 | 300.892 | 71.512 | 972.834  | 2.25 | 4.75 | 1.937 | -3.008 | -4.512 | -3.999 | 90.812  | 182.984 | -3.396 | -0.224 | 116.08 | 0 | 0 |
|    | ACE2 | -7.538094 | 378.516 | 1.02  | 751.227 | 393.323 | 76.706  | 281.198 | 0      | 1342.219 | 2    | 6    | 3.677 | -4.228 | -3.676 | -5.731 | 309.894 | 237.994 | -3.141 | 0.326  | 61.02  | 0 | 0 |
|  | ACE2 | -7.527599 | 326.36  | 6.308 | 596.035 | 147.927 | 108.43  | 258.053 | 81.624 | 1010.069 | 2    | 6    | 2.331 | -3.15  | -3.118 | -6.453 | 231.502 | 315.156 | -4.095 | -0.062 | 66.58  | 0 | 0 |
|  | ACE2 | -7.521512 | 384.437 | 6.146 | 692.471 | 264.157 | 215.65  | 212.664 | 0      | 1229.706 | 4    | 9.5  | 0.938 | -3.143 | -3.01  | -6.482 | 22.274  | 8.962   | -6.135 | -0.2   | 133.27 | 0 | 1 |

|                                                                                     |      |           |         |       |         |         |         |         |        |          |      |      |       |        |        |        |          |          |        |        |        |   |   |
|-------------------------------------------------------------------------------------|------|-----------|---------|-------|---------|---------|---------|---------|--------|----------|------|------|-------|--------|--------|--------|----------|----------|--------|--------|--------|---|---|
|                                                                                     |      |           |         |       |         |         |         |         |        |          |      |      |       |        |        |        |          |          |        |        |        |   |   |
| 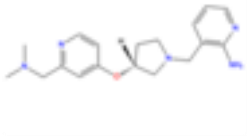   | ACE2 | -7.520437 | 327.428 | 1.263 | 653.815 | 332.174 | 89.901  | 231.741 | 0      | 1136.315 | 2    | 7.25 | 1.869 | -1.997 | -1.684 | -7.237 | 86.53    | 42.985   | -5.813 | -0.009 | 67.51  | 0 | 1 |
|    | ACE2 | -7.505628 | 331.417 | 5.268 | 653.198 | 449.322 | 101.063 | 102.813 | 0      | 1126.136 | 2    | 7    | 1.047 | -2.075 | -0.958 | -5.314 | 47.588   | 33.029   | -6.857 | -0.147 | 76.71  | 0 | 0 |
|  | ACE2 | -7.504407 | 375.401 | 2.446 | 694.757 | 81.23   | 50.84   | 536.06  | 26.627 | 1204.72  | 1    | 4.75 | 5.222 | -6.317 | -6.205 | -7.517 | 3264.289 | 2486.318 | 0.008  | 0.702  | 56.15  | 1 | 1 |
|  | ACE2 | -7.495692 | 337.38  | 5.066 | 553.004 | 98.244  | 154.475 | 300.284 | 0      | 1028.172 | 3.25 | 5.25 | 1.262 | -1.326 | -3.439 | -1.981 | 109.133  | 153.967  | -2.733 | -0.558 | 102.04 | 0 | 0 |

|                                                                                     |      |           |         |       |         |         |         |         |        |          |   |     |       |        |        |        |         |         |        |        |        |   |   |
|-------------------------------------------------------------------------------------|------|-----------|---------|-------|---------|---------|---------|---------|--------|----------|---|-----|-------|--------|--------|--------|---------|---------|--------|--------|--------|---|---|
|                                                                                     |      |           |         |       |         |         |         |         |        |          |   |     |       |        |        |        |         |         |        |        |        |   |   |
| 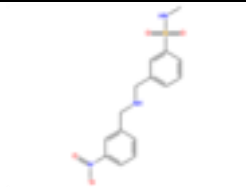   | ACE2 | -7.486144 | 335.377 | 7.168 | 622.634 | 149.704 | 206.544 | 264.737 | 1.649  | 1055.59  | 2 | 7   | 1.238 | -2.785 | -2.932 | -6.672 | 27.173  | 11.344  | -5.784 | -0.167 | 109.72 | 0 | 0 |
|    | ACE2 | -7.478851 | 331.417 | 5.339 | 646.24  | 345.461 | 79.394  | 221.385 | 0      | 1124.807 | 2 | 7.2 | 1.783 | -2.665 | -2.064 | -5.024 | 312.346 | 223.361 | -3.689 | -0.305 | 71.42  | 0 | 0 |
|  | ACE2 | -7.465323 | 484.544 | 8.291 | 888.116 | 302.042 | 139.484 | 371.717 | 74.873 | 1543.744 | 2 | 8.5 | 4.983 | -8.17  | -6.636 | -7.716 | 471.164 | 563.949 | -2.013 | 0.704  | 127.62 | 0 | 1 |
|  | ACE2 | -7.460227 | 290.324 | 7.182 | 514.637 | 325.38  | 142.292 | 46.966  | 0      | 910.482  | 2 | 7   | 0.623 | -1.87  | -2.008 | -4.379 | 110.52  | 50.618  | -5.847 | -0.231 | 87.95  | 0 | 0 |

|                                                                                     |      |           |         |       |         |         |         |         |         |          |   |      |       |        |        |        |         |          |        |        |        |   |   |
|-------------------------------------------------------------------------------------|------|-----------|---------|-------|---------|---------|---------|---------|---------|----------|---|------|-------|--------|--------|--------|---------|----------|--------|--------|--------|---|---|
|                                                                                     |      |           |         |       |         |         |         |         |         |          |   |      |       |        |        |        |         |          |        |        |        |   |   |
| 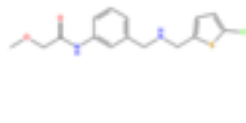   | ACE2 | -7.445454 | 324.824 | 7.319 | 607.458 | 217.233 | 56.13   | 230.713 | 103.381 | 1027.435 | 2 | 5.7  | 2.96  | -3.359 | -3.135 | -6.423 | 725.297 | 1424.905 | -3.132 | -0.015 | 78.6   | 0 | 1 |
|    | ACE2 | -7.443014 | 339.436 | 4.158 | 690.631 | 306.193 | 108.371 | 276.066 | 0       | 1193.033 | 2 | 7.25 | 2.126 | -2.611 | -1.921 | -7.736 | 57.812  | 27.797   | -5.997 | 0.119  | 55.81  | 0 | 1 |
|  | ACE2 | -7.442683 | 330.401 | 6.797 | 588.603 | 295.48  | 215.045 | 76.489  | 1.59    | 1032.119 | 4 | 7.5  | 0.387 | -1.87  | -2.212 | -5.226 | 22.57   | 9.275    | -6.508 | -0.366 | 135.74 | 0 | 1 |
|  | ACE2 | -7.438191 | 367.49  | 5.19  | 716.644 | 389.14  | 66.054  | 261.449 | 0       | 1268.261 | 2 | 7.7  | 2.689 | -2.74  | -2.344 | -7.618 | 145.65  | 75.465   | -5.173 | 0.19   | 53.6   | 0 | 1 |

|                                                                                     |      |           |         |        |         |         |         |         |        |          |   |      |       |        |        |        |          |          |        |        |        |   |   |
|-------------------------------------------------------------------------------------|------|-----------|---------|--------|---------|---------|---------|---------|--------|----------|---|------|-------|--------|--------|--------|----------|----------|--------|--------|--------|---|---|
|                                                                                     |      |           |         |        |         |         |         |         |        |          |   |      |       |        |        |        |          |          |        |        |        |   |   |
| 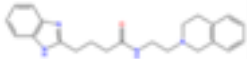   | ACE2 | -7.425942 | 362.474 | 6.574  | 732.411 | 285.689 | 88.299  | 358.422 | 0      | 1268.518 | 2 | 6    | 3.219 | -3.981 | -3.405 | -6.254 | 210.07   | 181.022  | -3.275 | 0.209  | 61.02  | 0 | 0 |
|    | ACE2 | -7.415595 | 346.472 | 4.944  | 687.662 | 511.727 | 52.182  | 123.753 | 0      | 1208.77  | 1 | 10.2 | 0.775 | -0.516 | 0.368  | -7.569 | 49.177   | 25.819   | -5.69  | -0.355 | 48.05  | 0 | 0 |
|  | ACE2 | -7.414    | 529.569 | 11.503 | 917.639 | 108.719 | 217.629 | 589.783 | 1.509  | 1613.357 | 1 | 10   | 4.324 | -7.925 | -7.432 | -8.795 | 85.532   | 35.348   | -2.781 | 0.617  | 140.13 | 1 | 1 |
|  | ACE2 | -7.412559 | 318.366 | 4.696  | 650.527 | 244.585 | 41.022  | 282.084 | 82.836 | 1092.645 | 2 | 4    | 4.085 | -4.681 | -3.674 | -7.023 | 1008.755 | 1570.704 | -2.768 | 0.473  | 41.13  | 0 | 0 |

|                                                                                     |      |           |         |       |         |         |         |         |         |          |   |      |       |        |        |        |          |          |        |        |        |   |   |
|-------------------------------------------------------------------------------------|------|-----------|---------|-------|---------|---------|---------|---------|---------|----------|---|------|-------|--------|--------|--------|----------|----------|--------|--------|--------|---|---|
|                                                                                     |      |           |         |       |         |         |         |         |         |          |   |      |       |        |        |        |          |          |        |        |        |   |   |
| 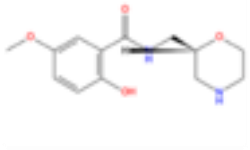   | ACE2 | -7.411243 | 266.296 | 5.651 | 523.862 | 297.944 | 113.466 | 112.451 | 0       | 882.994  | 2 | 6.2  | 0.998 | -1.658 | -1.66  | -5.227 | 207.395  | 99.947   | -4.797 | -0.333 | 79.82  | 0 | 0 |
|    | ACE2 | -7.402563 | 271.278 | 4.912 | 516.59  | 150.262 | 93.486  | 272.842 | 0       | 867.818  | 0 | 6.5  | 0.937 | -1.058 | -1.715 | -5.958 | 320.827  | 160.165  | -4.152 | -0.686 | 73.12  | 0 | 0 |
|  | ACE2 | -7.398419 | 353.38  | 3.353 | 635.808 | 218.845 | 167.613 | 249.35  | 0       | 1101.483 | 3 | 8.7  | 1.001 | -2.841 | -2.922 | -6.501 | 63.581   | 27.846   | -5.313 | -0.25  | 103.37 | 0 | 0 |
|  | ACE2 | -7.396006 | 344.595 | 6.192 | 536.412 | 117.44  | 93.68   | 180.991 | 144.301 | 893.592  | 1 | 3.75 | 3.423 | -4.694 | -5.372 | -5.042 | 1280.949 | 3990.826 | -2.224 | 0.158  | 67.15  | 0 | 0 |





|                                                                                     |      |           |         |       |         |         |         |         |         |          |   |      |       |        |        |        |          |          |        |        |       |   |   |
|-------------------------------------------------------------------------------------|------|-----------|---------|-------|---------|---------|---------|---------|---------|----------|---|------|-------|--------|--------|--------|----------|----------|--------|--------|-------|---|---|
|                                                                                     |      |           |         |       |         |         |         |         |         |          |   |      |       |        |        |        |          |          |        |        |       |   |   |
| 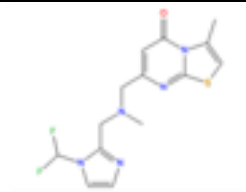   | ACE2 | -7.368598 | 339.362 | 3.833 | 584.672 | 209.287 | 64.182  | 172.441 | 138.762 | 1011.323 | 0 | 7.5  | 2.001 | -2.104 | -2.592 | -5.777 | 608.36   | 1841.082 | -3.773 | -0.622 | 84.19 | 0 | 0 |
|    | ACE2 | -7.366927 | 263.271 | 8.468 | 530.298 | 142.865 | 102.804 | 248.173 | 36.456  | 877.149  | 1 | 3.75 | 3.072 | -4.457 | -3.727 | -5.375 | 1049.567 | 825.596  | -2.06  | 0.071  | 67.15 | 0 | 0 |
|  | ACE2 | -7.363593 | 347.462 | 12.33 | 652.286 | 356.758 | 93.017  | 202.511 | 0       | 1173.025 | 1 | 5.5  | 3.41  | -4.78  | -4.8   | -6.061 | 324.129  | 161.947  | -3.911 | 0.436  | 56.88 | 0 | 0 |
|  | ACE2 | -7.361447 | 310.742 | 4.704 | 549.681 | 41.797  | 62.333  | 373.746 | 71.805  | 940.344  | 0 | 4    | 3.762 | -4.525 | -4.956 | -5.831 | 2539.793 | 3351.476 | -1.16  | 0.193  | 52.71 | 0 | 0 |

|                                                                                     |      |           |         |        |         |         |         |         |   |          |   |     |       |        |        |        |         |         |        |        |       |   |   |
|-------------------------------------------------------------------------------------|------|-----------|---------|--------|---------|---------|---------|---------|---|----------|---|-----|-------|--------|--------|--------|---------|---------|--------|--------|-------|---|---|
|                                                                                     |      |           |         |        |         |         |         |         |   |          |   |     |       |        |        |        |         |         |        |        |       |   |   |
| 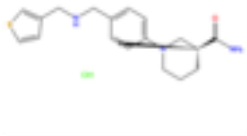   | ACE2 | -7.346939 |         |        |         |         |         |         |   |          |   |     |       |        |        |        |         |         |        |        | 86.6  |   |   |
|    | ACE2 | -7.344405 | 354.454 | 11.953 | 684.497 | 398.262 | 106.841 | 179.394 | 0 | 1203.2   | 2 | 8.5 | 1.601 | -2.6   | -1.482 | -7.088 | 59.775  | 28.819  | -6.598 | 0.059  | 77.15 | 0 | 0 |
|  | ACE2 | -7.339682 | 379.461 | 8.183  | 687.841 | 228.811 | 88.837  | 370.193 | 0 | 1223.4   | 2 | 7.2 | 2.493 | -4.001 | -3.349 | -5.817 | 268.558 | 178.74  | -3.531 | 0.025  | 71.42 | 0 | 0 |
|  | ACE2 | -7.33799  | 332.364 | 7.7    | 631.993 | 91.639  | 100.798 | 439.556 | 0 | 1089.678 | 1 | 6.5 | 2.587 | -4.015 | -3.948 | -5.323 | 723.71  | 546.542 | -1.445 | -0.188 | 77.63 | 0 | 0 |

|                                                                                     |      |           |         |       |         |         |         |         |        |         |   |     |       |        |        |        |         |        |        |        |       |   |   |
|-------------------------------------------------------------------------------------|------|-----------|---------|-------|---------|---------|---------|---------|--------|---------|---|-----|-------|--------|--------|--------|---------|--------|--------|--------|-------|---|---|
|                                                                                     |      |           |         |       |         |         |         |         |        |         |   |     |       |        |        |        |         |        |        |        |       |   |   |
| 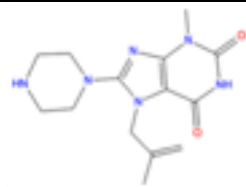   | ACE2 | -7.33643  | 304.351 | 8.103 | 514.289 | 340.305 | 145.182 | 28.802  | 0      | 934.615 | 2 | 7   | 0.74  | -1.784 | -2.267 | -4.031 | 103.762 | 47.28  | -5.964 | -0.161 | 87.95 | 0 | 0 |
|    | ACE2 | -7.3361   | 273.337 | 9.299 | 558.621 | 207.153 | 130.917 | 220.552 | 0      | 930.43  | 4 | 4.5 | 0.888 | -2.04  | -1.595 | -4.766 | 95.988  | 66.207 | -4.93  | -0.374 | 84.97 | 0 | 0 |
|  | ACE2 | -7.334131 | 277.341 | 4.879 | 555.38  | 190.578 | 79.746  | 238.24  | 46.815 | 957.033 | 2 | 4.7 | 2.808 | -2.976 | -2.57  | -5.892 | 433.076 | 399.81 | -3.541 | -0.009 | 50.08 | 0 | 0 |
|  | ACE2 | -7.330341 | 320.35  | 5.6   | 549.917 | 398.882 | 133.093 | 17.942  | 0      | 971.006 | 1 | 9.2 | 0.165 | -1.384 | -1.75  | -4.571 | 135.106 | 62.892 | -5.684 | -0.611 | 88.39 | 0 | 0 |

|                                                                                     |      |           |         |        |         |         |         |         |        |          |   |      |        |        |        |        |         |         |        |        |        |   |   |
|-------------------------------------------------------------------------------------|------|-----------|---------|--------|---------|---------|---------|---------|--------|----------|---|------|--------|--------|--------|--------|---------|---------|--------|--------|--------|---|---|
|                                                                                     |      |           |         |        |         |         |         |         |        |          |   |      |        |        |        |        |         |         |        |        |        |   |   |
| 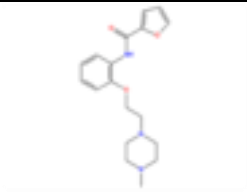   | ACE2 | -7.32206  | 329.398 | 6.744  | 639.348 | 282.8   | 61.805  | 294.744 | 0      | 1112.905 | 1 | 7.75 | 1.883  | -1.669 | -1.508 | -7.427 | 159.811 | 83.426  | -5.169 | -0.138 | 57.95  | 0 | 0 |
|    | ACE2 | -7.309969 | 376.498 | 7.298  | 703.092 | 483.784 | 65.633  | 153.674 | 0      | 1268.179 | 2 | 7.95 | 1.853  | -2.155 | -1.036 | -5.484 | 105.262 | 76.218  | -5.737 | -0.08  | 66.07  | 0 | 0 |
|  | ACE2 | -7.306415 | 323.314 | 8.631  | 538.488 | 232.383 | 177.146 | 72.453  | 56.506 | 917.411  | 3 | 9    | -0.171 | -1.774 | -1.617 | -5.064 | 51.633  | 45.352  | -6.208 | -0.595 | 108.82 | 0 | 0 |
|  | ACE2 | -7.305675 | 363.505 | 11.975 | 681.21  | 392.713 | 94.279  | 194.218 | 0      | 1247.545 | 1 | 5.5  | 3.862  | -5.13  | -5.138 | -6.053 | 315.321 | 157.196 | -3.867 | 0.594  | 56.88  | 0 | 0 |

|                                                                                     |      |           |         |       |         |         |         |         |        |          |   |      |       |        |        |        |         |         |        |        |        |   |   |
|-------------------------------------------------------------------------------------|------|-----------|---------|-------|---------|---------|---------|---------|--------|----------|---|------|-------|--------|--------|--------|---------|---------|--------|--------|--------|---|---|
|                                                                                     |      |           |         |       |         |         |         |         |        |          |   |      |       |        |        |        |         |         |        |        |        |   |   |
| 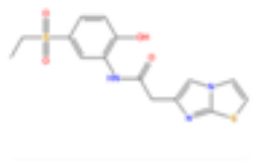   | ACE2 | -7.304225 | 365.421 | 14.8  | 617.576 | 167.718 | 164.746 | 228.898 | 56.214 | 1078.961 | 2 | 8.75 | 1.704 | -3.807 | -4.033 | -5.475 | 271.404 | 245.524 | -3.173 | -0.346 | 137.91 | 0 | 0 |
|    | ACE2 | -7.302589 | 402.452 | 9.819 | 728.311 | 132.67  | 177.373 | 418.268 | 0      | 1273.941 | 4 | 6.75 | 2.677 | -4.372 | -4.698 | -7.807 | 51.377  | 22.117  | -4.706 | 0.278  | 99.01  | 0 | 0 |
|  | ACE2 | -7.301904 | 349.475 | 3.947 | 710.759 | 317.825 | 81.729  | 311.205 | 0      | 1243.946 | 1 | 6.7  | 3.011 | -4.14  | -3.375 | -7.915 | 103.435 | 52.129  | -5.383 | 0.364  | 48.29  | 0 | 0 |
|  | ACE2 | -7.279934 | 233.316 | 4.78  | 483.209 | 242.124 | 154.441 | 86.644  | 0      | 814.597  | 4 | 5.5  | -0.28 | -0.073 | -0.099 | -5.453 | 21.141  | 9.371   | -7.802 | -0.41  | 81.06  | 0 | 1 |

|                                                                                     |      |           |         |       |         |         |         |         |        |          |      |      |       |        |        |        |         |         |        |        |       |   |   |
|-------------------------------------------------------------------------------------|------|-----------|---------|-------|---------|---------|---------|---------|--------|----------|------|------|-------|--------|--------|--------|---------|---------|--------|--------|-------|---|---|
|                                                                                     |      |           |         |       |         |         |         |         |        |          |      |      |       |        |        |        |         |         |        |        |       |   |   |
| 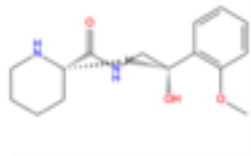   | ACE2 | -7.278091 | 278.35  | 4.226 | 575.036 | 336.357 | 89.639  | 149.04  | 0      | 980.428  | 3    | 6.45 | 0.914 | -1.62  | -1.065 | -4.345 | 242.418 | 175.388 | -4.133 | -0.549 | 70.59 | 0 | 0 |
|    | ACE2 | -7.273845 | 263.286 | 1.272 | 535.008 | 120.014 | 60.175  | 275.533 | 79.285 | 889.512  | 2    | 3.2  | 3.011 | -2.986 | -2.861 | -6.225 | 663.986 | 955.716 | -3.144 | 0.087  | 32.26 | 0 | 0 |
|  | ACE2 | -7.272896 | 368.394 | 7.612 | 697.512 | 35.663  | 123.562 | 538.288 | 0      | 1201.685 | 1    | 6.25 | 3.964 | -6.68  | -6.466 | -7.599 | 667.058 | 319.368 | -1.324 | 0.384  | 79.94 | 0 | 1 |
|  | ACE2 | -7.271333 | 398.479 | 9.225 | 746.133 | 267.382 | 85.355  | 346.577 | 46.819 | 1320.666 | 1.25 | 8.25 | 2.381 | -2.658 | -1.677 | -6.819 | 63.498  | 86.375  | -5.325 | -0.069 | 64.68 | 0 | 0 |

|                                                                                     |      |           |         |       |         |         |         |         |        |          |   |      |       |        |        |        |          |          |        |        |       |   |   |
|-------------------------------------------------------------------------------------|------|-----------|---------|-------|---------|---------|---------|---------|--------|----------|---|------|-------|--------|--------|--------|----------|----------|--------|--------|-------|---|---|
|                                                                                     |      |           |         |       |         |         |         |         |        |          |   |      |       |        |        |        |          |          |        |        |       |   |   |
| 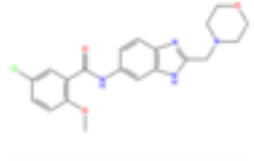   | ACE2 | -7.268946 | 400.864 | 4.02  | 699.58  | 312.751 | 82.823  | 232.459 | 71.547 | 1221.074 | 2 | 8.45 | 2.749 | -4.381 | -3.937 | -6.769 | 404.936  | 507.92   | -3.81  | 0.061  | 79.48 | 0 | 0 |
|    | ACE2 | -7.26034  | 329.459 | 5.427 | 623.37  | 214.272 | 120.069 | 240.792 | 48.237 | 1091.302 | 3 | 5    | 2.179 | -2.503 | -2.783 | -4.907 | 88.877   | 157.158  | -4.467 | -0.037 | 86.6  | 0 | 0 |
|  | ACE2 | -7.25658  | 415.534 | 5.526 | 815.057 | 308.322 | 61.467  | 445.268 | 0      | 1425.099 | 1 | 7.25 | 4.198 | -4.613 | -3.72  | -9.13  | 160.994  | 84.094   | -4.441 | 0.677  | 44.81 | 0 | 0 |
|  | ACE2 | -7.256458 | 375.401 | 6.613 | 691.971 | 107.874 | 47.582  | 489.647 | 46.869 | 1200.064 | 1 | 4.75 | 5.239 | -6.518 | -6.205 | -7.277 | 3504.969 | 3466.053 | -0.191 | 0.732  | 56.15 | 1 | 1 |



|                                                                                     |      |           |         |       |         |         |         |         |   |          |   |     |        |        |        |        |        |        |        |        |        |   |   |
|-------------------------------------------------------------------------------------|------|-----------|---------|-------|---------|---------|---------|---------|---|----------|---|-----|--------|--------|--------|--------|--------|--------|--------|--------|--------|---|---|
|                                                                                     |      |           |         |       |         |         |         |         |   |          |   |     |        |        |        |        |        |        |        |        |        |   |   |
| 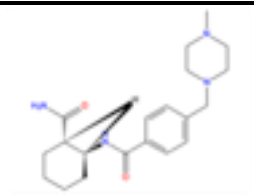   | ACE2 | -7.2544   | 358.483 | 2.144 | 683.052 | 441.196 | 122.528 | 119.328 | 0 | 1219.428 | 2 | 8   | 1.102  | -1.798 | -1.032 | -5.284 | 27.655 | 19.901 | -7.002 | -0.167 | 78.67  | 0 | 0 |
|    | ACE2 | -7.252306 | 320.35  | 1.471 | 565.766 | 378.849 | 172.245 | 14.673  | 0 | 1002.49  | 1 | 10  | -0.878 | -0.371 | -0.749 | -3.28  | 30.366 | 24.963 | -6.513 | -0.971 | 96.23  | 0 | 0 |
|  | ACE2 | -7.251865 | 328.413 | 3.645 | 612.465 | 297.962 | 117.734 | 196.769 | 0 | 1087.185 | 1 | 7   | 0.189  | -2.311 | -1.721 | -4.787 | 11.935 | 6.424  | -6.641 | -0.161 | 68.7   | 0 | 1 |
|  | ACE2 | -7.250268 | 354.368 | 7.873 | 633.778 | 212.976 | 192.196 | 228.606 | 0 | 1094.188 | 4 | 9.5 | 0.348  | -2.773 | -2.515 | -6.419 | 37.171 | 15.588 | -5.935 | -0.355 | 128.07 | 0 | 0 |

|                                                                                     |         |           |         |       |         |         |         |         |        |          |     |      |       |        |        |        |         |         |        |        |       |   |   |
|-------------------------------------------------------------------------------------|---------|-----------|---------|-------|---------|---------|---------|---------|--------|----------|-----|------|-------|--------|--------|--------|---------|---------|--------|--------|-------|---|---|
|                                                                                     |         |           |         |       |         |         |         |         |        |          |     |      |       |        |        |        |         |         |        |        |       |   |   |
| 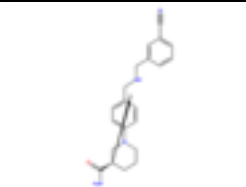   | ACE2    | -7.247289 | 348.447 | 3.687 | 677.845 | 212.632 | 185.469 | 279.744 | 0      | 1186.358 | 3   | 6.5  | 1.598 | -3.652 | -3.698 | -5.461 | 21.359  | 18.27   | -5.439 | -0.087 | 82.15 | 0 | 1 |
|    | ACE2    | -7.244727 |         |       |         |         |         |         |        |          |     |      |       |        |        |        |         |         |        |        | 41.13 |   |   |
|  | ACE2    | -7.198821 | 315.417 | 1.511 | 640.184 | 351.025 | 94.841  | 194.317 | 0      | 1105.1   | 2   | 8    | 1.31  | -1.87  | -1.073 | -7.026 | 77.682  | 38.254  | -6.228 | -0.129 | 64.26 | 0 | 0 |
|  | TMPRSS2 | -7.198013 | 435.429 | 5.901 | 758.866 | 79.377  | 139.358 | 447.359 | 92.773 | 1337.641 | 0.5 | 5.75 | 5.223 | -7.861 | -7.858 | -7.328 | 472.468 | 708.916 | -1.648 | 0.721  | 91.22 | 1 | 1 |

|                                                                                     |         |           |         |       |         |         |         |         |         |          |      |      |       |        |        |        |          |          |        |       |       |   |   |
|-------------------------------------------------------------------------------------|---------|-----------|---------|-------|---------|---------|---------|---------|---------|----------|------|------|-------|--------|--------|--------|----------|----------|--------|-------|-------|---|---|
|                                                                                     |         |           |         |       |         |         |         |         |         |          |      |      |       |        |        |        |          |          |        |       |       |   |   |
| 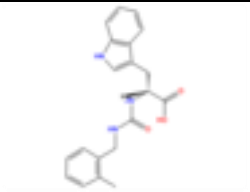   | TMPRSS2 | -7.196331 | 351.404 | 1.402 | 648.738 | 118.106 | 165.673 | 364.959 | 0       | 1136.756 | 3.25 | 3.25 | 3.725 | -4.755 | -5.026 | -3.133 | 46.367   | 34.076   | -2.711 | 0.102 | 94.22 | 0 | 0 |
|    | TMPRSS2 | -7.193332 | 364.434 | 5.51  | 579.16  | 244.487 | 102.546 | 202.749 | 29.378  | 1080.461 | 1.25 | 6.25 | 3.1   | -3.775 | -4.846 | -4.453 | 1055.491 | 759.684  | -2.119 | 0.12  | 83.65 | 0 | 0 |
|  | TMPRSS2 | -7.190593 | 383.206 | 2.998 | 627.08  | 61.708  | 101.542 | 280.118 | 183.713 | 1079.409 | 1    | 6.45 | 3.621 | -5.145 | -5.385 | -5.918 | 1078.896 | 5449.733 | -1.828 | 0.033 | 64.35 | 0 | 0 |
|  | TMPRSS2 | -7.180751 | 439.47  | 9.343 | 708.867 | 139.296 | 133.923 | 435.649 | 0       | 1320.028 | 1    | 7    | 4.219 | -5.594 | -6.408 | -6.507 | 531.998  | 250.087  | -1.877 | 0.566 | 95.58 | 0 | 0 |

|                                                                                    |         |           |         |        |         |         |         |         |         |          |      |      |       |        |        |        |          |          |        |        |        |   |   |
|------------------------------------------------------------------------------------|---------|-----------|---------|--------|---------|---------|---------|---------|---------|----------|------|------|-------|--------|--------|--------|----------|----------|--------|--------|--------|---|---|
|                                                                                    |         |           |         |        |         |         |         |         |         |          |      |      |       |        |        |        |          |          |        |        |        |   |   |
| 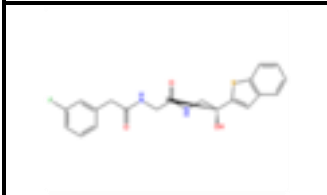   | TMPRSS2 | -7.173833 | 386.44  | 5.309  | 676.549 | 146.915 | 105.569 | 350.51  | 73.554  | 1193.44  | 2.25 | 5.95 | 2.803 | -4.01  | -4.24  | -3.622 | 468.999  | 1234.943 | -1.462 | -0.336 | 106.67 | 0 | 0 |
|    | TMPRSS2 | -7.160395 | 426.369 | 11.352 | 696.444 | 66.994  | 228.497 | 285.014 | 115.939 | 1184.441 | 2.25 | 8.25 | 2.313 | -5.333 | -5.509 | -6.494 | 67.463   | 115.831  | -4.055 | -0.093 | 132.65 | 0 | 0 |
|  | TMPRSS2 | -7.159434 | 366.364 | 9.028  | 613.691 | 311.3   | 70.187  | 161.739 | 70.465  | 1088.784 | 2    | 6.95 | 3.097 | -4.499 | -4.571 | -4.989 | 2139.515 | 2737.735 | -1.763 | 0.032  | 84.59  | 0 | 0 |
|  | TMPRSS2 | -7.149125 | 361.443 | 3.133  | 698.042 | 181.974 | 95.675  | 420.392 | 0       | 1228.936 | 0.5  | 4.5  | 5.004 | -6.367 | -5.734 | -6.856 | 1226.353 | 616.784  | -1.226 | 0.832  | 71.09  | 1 | 1 |

|                                                                                     |         |           |         |       |         |         |         |         |         |          |      |      |       |        |        |        |          |         |        |        |        |   |   |
|-------------------------------------------------------------------------------------|---------|-----------|---------|-------|---------|---------|---------|---------|---------|----------|------|------|-------|--------|--------|--------|----------|---------|--------|--------|--------|---|---|
|                                                                                     |         |           |         |       |         |         |         |         |         |          |      |      |       |        |        |        |          |         |        |        |        |   |   |
| 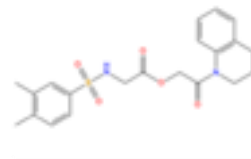   | TMPRSS2 | -7.148417 | 416.491 | 7.66  | 750.631 | 325.174 | 182.811 | 240.844 | 1.801   | 1317.019 | 0.25 | 8.75 | 2.833 | -5.373 | -4.83  | -6.336 | 182.936  | 80.696  | -3.464 | 0.053  | 101.16 | 0 | 0 |
|    | TMPRSS2 | -7.143432 | 429.37  | 7.185 | 642.193 | 75.412  | 166.892 | 282.141 | 117.747 | 1132.701 | 1.25 | 10   | 1.837 | -4.088 | -4.829 | -5.818 | 258.978  | 507.196 | -3.121 | -0.457 | 113.19 | 0 | 0 |
|  | TMPRSS2 | -7.139957 | 407.342 | 9.809 | 647.691 | 172.131 | 45.146  | 223.073 | 207.341 | 1158.454 | 1    | 3.5  | 5.828 | -7.375 | -6.929 | -5.45  | 3696.428 | 10000   | -1.374 | 1.009  | 46.92  | 1 | 1 |
|  | TMPRSS2 | -7.139395 | 339.433 | 4.189 | 659.73  | 246.553 | 112.288 | 300.889 | 0       | 1163.333 | 3    | 4.95 | 3.1   | -3.778 | -4.046 | -4.653 | 453.669  | 416.728 | -1.761 | 0.019  | 69.56  | 0 | 0 |

|                                                                                     |         |           |         |       |         |         |         |         |        |          |      |       |        |        |        |        |          |          |        |        |        |   |   |
|-------------------------------------------------------------------------------------|---------|-----------|---------|-------|---------|---------|---------|---------|--------|----------|------|-------|--------|--------|--------|--------|----------|----------|--------|--------|--------|---|---|
|                                                                                     |         |           |         |       |         |         |         |         |        |          |      |       |        |        |        |        |          |          |        |        |        |   |   |
| 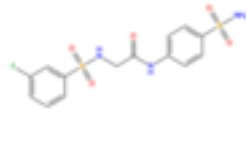   | TMPRSS2 | -7.139361 | 387.4   | 9.787 | 642.752 | 31.129  | 278.874 | 282.589 | 50.16  | 1086.52  | 3.25 | 10.75 | 0.103  | -3.556 | -3.591 | -6.193 | 22.456   | 15.386   | -4.992 | -0.693 | 152.19 | 0 | 1 |
|    | TMPRSS2 | -7.129755 | 344.403 | 3.595 | 640.97  | 202.911 | 87.038  | 262.124 | 88.897 | 1092.952 | 0.5  | 4     | 4.567  | -6.246 | -5.335 | -6.009 | 1480.862 | 2320.783 | -1.816 | 0.65   | 83.5   | 0 | 1 |
|  | TMPRSS2 | -7.126673 | 411.478 | 7.882 | 746.337 | 202.535 | 205.884 | 319.503 | 18.415 | 1295.551 | 1.25 | 9.25  | 2.502  | -4.204 | -4.899 | -6.776 | 4.401    | 57.726   | -3.612 | 0.02   | 136.05 | 0 | 1 |
|  | ACE2    | -7.125758 | 365.391 | 2.756 | 654.339 | 143.284 | 283.504 | 227.551 | 0      | 1126.27  | 5    | 9     | -0.724 | -1.796 | -2.235 | -5.204 | 2.459    | 1.807    | -7.621 | -0.601 | 124.08 | 0 | 1 |

|                                                                                    |         |           |         |       |         |         |         |         |         |          |   |     |       |        |        |        |          |          |        |        |        |   |   |
|------------------------------------------------------------------------------------|---------|-----------|---------|-------|---------|---------|---------|---------|---------|----------|---|-----|-------|--------|--------|--------|----------|----------|--------|--------|--------|---|---|
|                                                                                    |         |           |         |       |         |         |         |         |         |          |   |     |       |        |        |        |          |          |        |        |        |   |   |
| 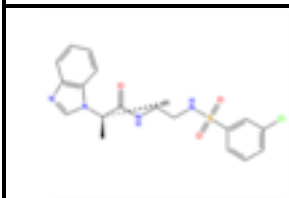   | TMPRSS2 | -7.125183 | 406.886 | 5.164 | 640.292 | 132.761 | 143.949 | 311.817 | 51.765  | 1173.513 | 2 | 8.5 | 1.985 | -3.371 | -4.342 | -4.228 | 291.915  | 379.222  | -2.402 | -0.423 | 101.47 | 0 | 0 |
|    | TMPRSS2 | -7.124544 | 380.464 | 11.12 | 636.819 | 145.355 | 94.849  | 395.518 | 1.098   | 1156.995 | 1 | 6   | 3.85  | -5.037 | -5.749 | -6.056 | 1248.669 | 637.694  | -1.49  | 0.426  | 77.3   | 0 | 0 |
|  | TMPRSS2 | -7.123749 | 342.36  | 5.687 | 556.93  | 90.353  | 134.098 | 259.071 | 73.408  | 983.273  | 2 | 7.7 | 1.883 | -2.908 | -3.86  | -5.055 | 529.968  | 628.678  | -2.31  | -0.448 | 87.67  | 0 | 0 |
|  | TMPRSS2 | -7.121373 | 372.361 | 7.1   | 630.702 | 113.691 | 115.692 | 282.292 | 119.028 | 1082.843 | 2 | 7   | 2.405 | -3.948 | -4.052 | -4.601 | 537.341  | 1725.801 | -1.985 | -0.419 | 83.65  | 0 | 0 |

|                                                                                     |         |           |         |       |         |         |         |         |         |          |     |      |       |        |        |        |          |          |        |        |        |   |   |
|-------------------------------------------------------------------------------------|---------|-----------|---------|-------|---------|---------|---------|---------|---------|----------|-----|------|-------|--------|--------|--------|----------|----------|--------|--------|--------|---|---|
|                                                                                     |         |           |         |       |         |         |         |         |         |          |     |      |       |        |        |        |          |          |        |        |        |   |   |
| 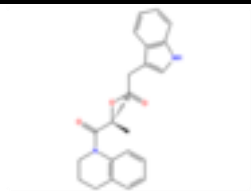   | TMPRSS2 | -7.120618 | 362.427 | 6.637 | 676.998 | 237.861 | 79.23   | 359.907 | 0       | 1192.818 | 1   | 5    | 4.543 | -6.114 | -5.527 | -6.429 | 1756.139 | 909.263  | -1.328 | 0.709  | 62.4   | 0 | 1 |
|    | TMPRSS2 | -7.119263 | 550.38  | 5.289 | 786.923 | 59.506  | 268.469 | 380.872 | 78.076  | 1419.012 | 3   | 10.4 | 2.489 | -5.317 | -7.201 | -6.972 | 28.185   | 27.97    | -4.07  | -0.073 | 167.25 | 1 | 0 |
|  | TMPRSS2 | -7.118744 | 477.488 | 5.774 | 778.932 | 353.272 | 216.943 | 207.058 | 1.659   | 1393.637 | 1.5 | 11.5 | 1.261 | -4.185 | -4.487 | -4.792 | 65.158   | 35.993   | -3.924 | -0.609 | 157.51 | 1 | 0 |
|  | TMPRSS2 | -7.115764 | 379.245 | 2.889 | 673.94  | 163.33  | 103.54  | 270.211 | 136.859 | 1150.596 | 1   | 5.95 | 4.065 | -5.974 | -5.565 | -6.252 | 1032.835 | 2878.931 | -1.9   | 0.31   | 73.06  | 0 | 1 |



|                                                                                    |         |           |         |       |         |         |         |         |         |          |      |      |       |        |        |        |         |         |        |        |        |   |   |
|------------------------------------------------------------------------------------|---------|-----------|---------|-------|---------|---------|---------|---------|---------|----------|------|------|-------|--------|--------|--------|---------|---------|--------|--------|--------|---|---|
|                                                                                    |         |           |         |       |         |         |         |         |         |          |      |      |       |        |        |        |         |         |        |        |        |   |   |
| 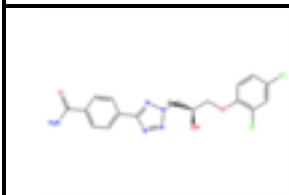   | TMPRSS2 | -7.113681 | 408.243 | 3.775 | 691.755 | 82.947  | 207.404 | 264.373 | 137.031 | 1185.612 | 3    | 8.45 | 2.351 | -5.269 | -5.104 | -6.302 | 106.927 | 248.638 | -3.739 | -0.134 | 116.15 | 0 | 0 |
|    | TMPRSS2 | -7.113242 | 378.442 | 8.564 | 692.511 | 366.63  | 136.154 | 188.137 | 1.59    | 1196.49  | 1.25 | 7.75 | 2.791 | -4.898 | -4.539 | -5.875 | 506.696 | 242.062 | -2.694 | 0.033  | 102.11 | 0 | 0 |
|  | TMPRSS2 | -7.112836 | 380.418 | 8.015 | 684.629 | 334.77  | 203.513 | 145.722 | 0.623   | 1179.999 | 1    | 9.5  | 1.447 | -4.228 | -3.871 | -5.644 | 116.409 | 48.776  | -4.181 | -0.335 | 127.65 | 0 | 0 |
|  | TMPRSS2 | -7.108118 | 438.439 | 4.607 | 781.93  | 242.632 | 235.806 | 303.492 | 0       | 1371.885 | 3    | 9.75 | 1.653 | -5.077 | -4.507 | -5.43  | 47.596  | 22.583  | -3.932 | -0.329 | 142.61 | 0 | 0 |

|                                                                                    |         |           |         |        |         |         |         |         |         |          |      |      |       |        |         |        |          |          |        |        |        |   |   |
|------------------------------------------------------------------------------------|---------|-----------|---------|--------|---------|---------|---------|---------|---------|----------|------|------|-------|--------|---------|--------|----------|----------|--------|--------|--------|---|---|
|                                                                                    |         |           |         |        |         |         |         |         |         |          |      |      |       |        |         |        |          |          |        |        |        |   |   |
| 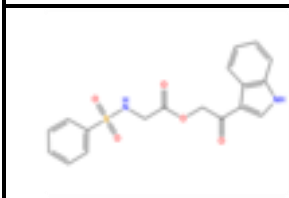   | TMPRSS2 | -7.106572 | 372.395 | 11.376 | 645.657 | 60.852  | 205.6   | 377.792 | 1.413   | 1123.387 | 0.25 | 6.75 | 2.519 | -4.207 | -4.92   | -6.417 | 111.224  | 46.897   | -3.306 | -0.043 | 113.71 | 0 | 0 |
|    | TMPRSS2 | -7.104517 | 379.418 | 7.175  | 687.2   | 233.08  | 178.977 | 275.143 | 0       | 1202.409 | 2    | 8    | 2.458 | -5.079 | -4.444  | -6.149 | 198.911  | 86.354   | -3.369 | 0.101  | 98.02  | 0 | 0 |
|  | TMPRSS2 | -7.100698 | 306.363 | 9.28   | 626.595 | 124.041 | 140.726 | 361.828 | 0       | 1067.935 | 2    | 4.75 | 3.268 | -5.523 | -5.221  | -6.39  | 458.559  | 212.99   | -2.07  | 0.203  | 73.12  | 0 | 0 |
|  | TMPRSS2 | -7.099033 | 636.69  | 13.957 | 828.232 | 224.023 | 100.19  | 356.765 | 147.253 | 1682.305 | 3    | 8.5  | 6.306 | -6.722 | -10.219 | -6.05  | 1111.218 | 3552.286 | -0.957 | 0.935  | 144.31 | 2 | 1 |

|                                                                                     |         |           |         |       |         |         |         |         |         |          |   |      |       |        |        |        |          |          |        |        |       |   |   |
|-------------------------------------------------------------------------------------|---------|-----------|---------|-------|---------|---------|---------|---------|---------|----------|---|------|-------|--------|--------|--------|----------|----------|--------|--------|-------|---|---|
|                                                                                     |         |           |         |       |         |         |         |         |         |          |   |      |       |        |        |        |          |          |        |        |       |   |   |
| 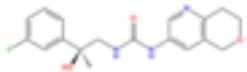   | TMPRSS2 | -7.095425 | 345.373 | 7.548 | 615.637 | 262.199 | 93.293  | 213.342 | 46.803  | 1077.988 | 3 | 5.45 | 2.611 | -4.165 | -4.056 | -3.992 | 935.62   | 1177.411 | -2.007 | -0.134 | 83.48 | 0 | 0 |
|    | TMPRSS2 | -7.090923 | 309.364 | 4.762 | 601.423 | 190.574 | 70.907  | 339.942 | 0       | 1040.559 | 2 | 3.75 | 3.956 | -4.915 | -4.811 | -5.973 | 2106.149 | 1106.632 | -1.149 | 0.436  | 62.47 | 0 | 0 |
|  | TMPRSS2 | -7.089504 | 452.567 | 8.415 | 749.07  | 253.442 | 105.812 | 388.73  | 1.086   | 1387.553 | 2 | 7.75 | 3.724 | -5.474 | -5.625 | -5.196 | 785.527  | 492.245  | -1.428 | 0.219  | 95.09 | 0 | 0 |
|  | TMPRSS2 | -7.088645 | 390.352 | 7.337 | 591.206 | 52.022  | 120.712 | 291.479 | 126.993 | 1056.239 | 1 | 6    | 3.405 | -4.469 | -5.47  | -5.375 | 709.879  | 1694.98  | -2.141 | 0.08   | 83.65 | 0 | 0 |

|                                                                                     |         |           |         |       |         |         |         |         |        |          |      |      |       |        |        |        |          |          |        |        |       |   |   |
|-------------------------------------------------------------------------------------|---------|-----------|---------|-------|---------|---------|---------|---------|--------|----------|------|------|-------|--------|--------|--------|----------|----------|--------|--------|-------|---|---|
|                                                                                     |         |           |         |       |         |         |         |         |        |          |      |      |       |        |        |        |          |          |        |        |       |   |   |
| 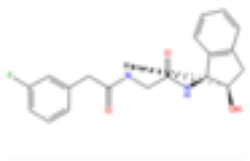   | TMPRSS2 | -7.083628 | 342.369 | 4.5   | 629.784 | 167.638 | 94.787  | 320.465 | 46.893 | 1097.01  | 2.25 | 5.95 | 2.155 | -3.41  | -3.183 | -3.276 | 586.718  | 1137.925 | -1.561 | -0.488 | 78.43 | 0 | 0 |
|    | TMPRSS2 | -7.082909 | 449.3   | 1.091 | 760.509 | 278.98  | 129.923 | 274.286 | 77.32  | 1310.404 | 0.25 | 6    | 4.739 | -6.816 | -6.663 | -6.699 | 580.55   | 728.866  | -2.18  | 0.602  | 93.73 | 0 | 1 |
|  | TMPRSS2 | -7.082199 | 322.341 | 5.213 | 549.522 | 86.169  | 91.738  | 336.722 | 34.893 | 984.024  | 2    | 4    | 3.516 | -4.263 | -5.16  | -5.231 | 1336.452 | 1051.076 | -1.64  | 0.312  | 62.71 | 0 | 0 |
|  | ACE2    | -7.078639 | 287.404 | 2.728 | 580.966 | 355.941 | 58.263  | 166.762 | 0      | 1014.303 | 2    | 6    | 1.151 | -1     | -0.409 | -4.989 | 110.004  | 90.699   | -5.843 | -0.228 | 44.37 | 0 | 0 |

|                                                                                     |      |           |         |       |         |         |         |         |         |          |      |      |        |        |        |        |         |         |        |        |        |   |   |
|-------------------------------------------------------------------------------------|------|-----------|---------|-------|---------|---------|---------|---------|---------|----------|------|------|--------|--------|--------|--------|---------|---------|--------|--------|--------|---|---|
|                                                                                     |      |           |         |       |         |         |         |         |         |          |      |      |        |        |        |        |         |         |        |        |        |   |   |
| 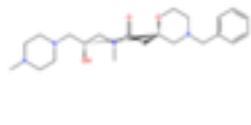   | ACE2 | -7.062327 | 404.551 | 3.138 | 778.981 | 522.587 | 67.043  | 189.351 | 0       | 1398.309 | 1    | 12.4 | 0.336  | 0.239  | 0.766  | -6.858 | 22.943  | 18.181  | -5.349 | -0.838 | 59.49  | 0 | 2 |
|    | ACE2 | -7.056257 | 451.38  | 4.416 | 737.258 | 247.003 | 80.781  | 283.956 | 125.517 | 1282.761 | 1.25 | 8.25 | 2.399  | -2.479 | -3.099 | -6.614 | 57.219  | 259.641 | -5.461 | -0.172 | 92.92  | 0 | 1 |
|  | ACE2 | -7.040755 | 368.496 | 4.712 | 603.772 | 301.717 | 63.367  | 203.659 | 35.029  | 1139.715 | 2    | 6    | 2.613  | -2.249 | -3.479 | -3.895 | 428.802 | 507.196 | -3.36  | -0.057 | 86.32  | 0 | 0 |
|  | ACE2 | -7.011648 | 317.347 | 8.631 | 589.06  | 188.963 | 274.875 | 125.222 | 0       | 1003.725 | 5    | 9    | -1.432 | -0.967 | -1.05  | -4.345 | 3.082   | 2.215   | -7.823 | -0.809 | 124.08 | 0 | 1 |

|                                                                                   |                |           |        |       |        |         |         |         |        |         |   |     |       |        |        |       |         |          |        |        |       |   |   |
|-----------------------------------------------------------------------------------|----------------|-----------|--------|-------|--------|---------|---------|---------|--------|---------|---|-----|-------|--------|--------|-------|---------|----------|--------|--------|-------|---|---|
|                                                                                   |                |           |        |       |        |         |         |         |        |         |   |     |       |        |        |       |         |          |        |        |       |   |   |
| 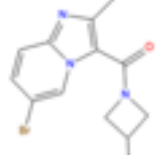 | <b>TMPRSS2</b> | -7.004282 | 310.15 | 4.035 | 492.17 | 175.934 | 111.708 | 127.091 | 77.438 | 823.474 | 1 | 5.2 | 1.975 | -3.325 | -3.798 | -4.35 | 864.122 | 1122.014 | -2.843 | -0.236 | 58.36 | 0 | 0 |
