# Supplementary material for: Attacking COVID-19 Progression Using Multi-Drug Therapy for Synergetic Target Engagement
Source: MDPI journal article supplement (doi:10.3390/biom11060787), 2021-05-23
Supplement: s1 [file s1]

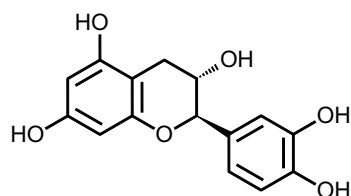

title: S4722 (+)-Catechin  
 ENZYME: MPro  
 docking score: -6.73

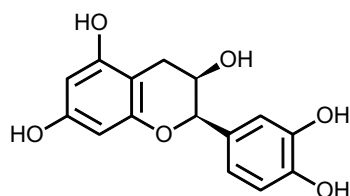

title: S4723 (-)-Epicatechin  
 ENZYME: MPro  
 docking score: -6.322

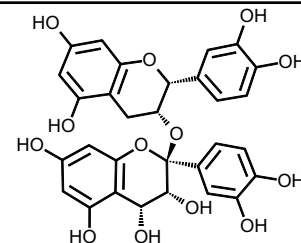

title: S5105  
 ENZYME: MPro  
 docking score: -6.19

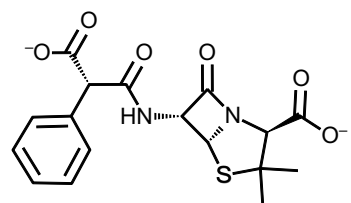

title: Carbenicillin disodium  
 ENZYME: MPro  
 docking score: -5.779

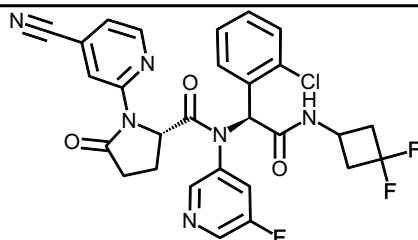

title: AG-120 (Ivosidenib)  
 ENZYME: MPro  
 docking score: -5.522

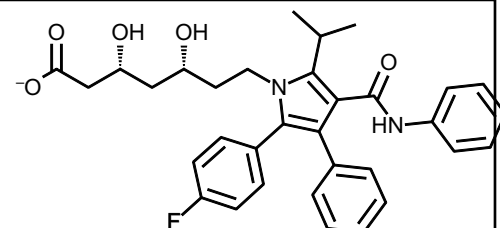

title: Atorvastatin calcium  
 ENZYME: MPro  
 docking score: -5.39

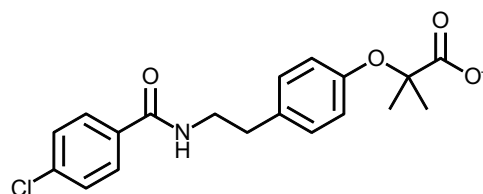

title: Bezafibrate  
 ENZYME: MPro  
 docking score: -4.933

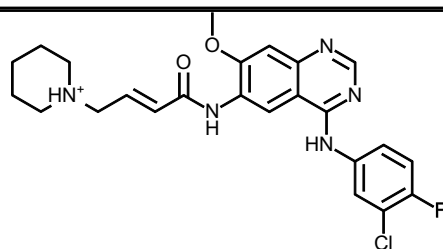

title: PF299804  
 ENZYME: MPro  
 docking score: -4.339

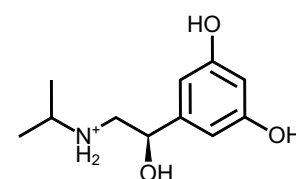

title: metaproterenol  
 sulfate(orcioprenaline sulfate)  
 ENZYME: Ace2  
 docking score: -8.048

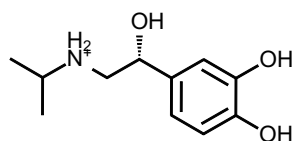

title: Isoprenaline  
 hydrochloride  
 ENZYME: Ace2  
 docking score: -7.442

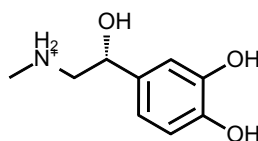

title: Epinephrine HCl  
 ENZYME: Ace2  
 docking score: -7.115

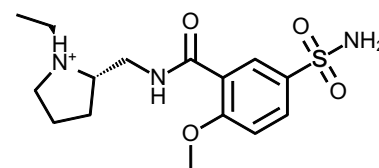

title: Levosulpiride  
 ENZYME: Ace2  
 docking score: -6.874

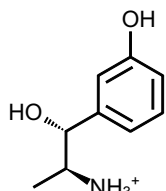

title: metaraminol bitartrate  
 ENZYME: Ace2  
 docking score: -6.838

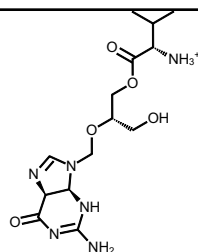

title: valganciclovir  
 hydrochloride  
 ENZYME: Ace2  
 docking score: -6.584

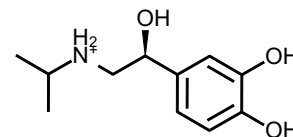

title: Isoprenaline  
 hydrochloride  
 ENZYME: Ace2  
 docking score: -6.454

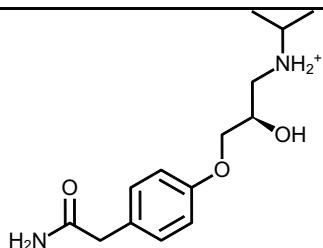

title: S4817 Atenolol  
 ENZYME: Ace2  
 docking score: -6.346

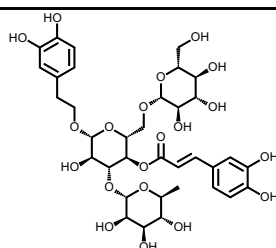

title: S3783 Echinacoside  
 ENZYME: Ace2  
 docking score: -6.086

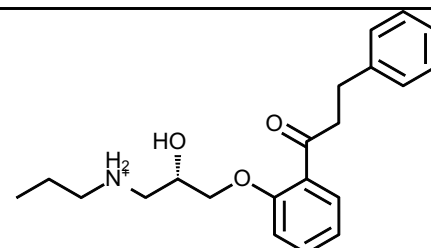

title: Propafenone  
 ENZYME: Ace2  
 docking score: -6.04

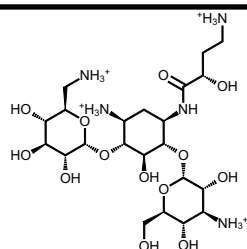

title: Amikacin sulfate  
 ENZYME: Ace2  
 docking score: -5.976

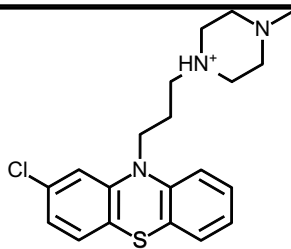

title: Prochlorperazine  
 dimaleate salt  
 ENZYME: Ace2  
 docking score: -5.793

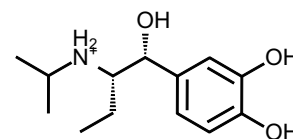

title: isoetharine mesylate  
 ENZYME: Ace2  
 docking score: -5.467

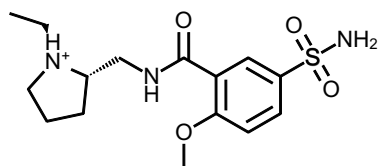

title: Levosulpiride  
 ENZYME: Ace2  
 docking score: -6.874

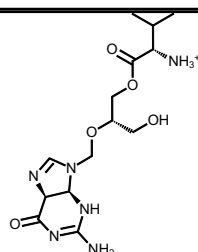

title: valganciclovir  
 hydrochloride  
 ENZYME: Ace2  
 docking score: -6.366

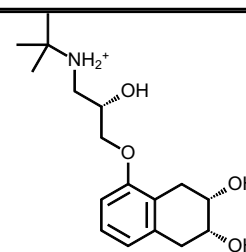

title: S5023 Nadolol  
 ENZYME: Ace2  
 docking score: -5.158

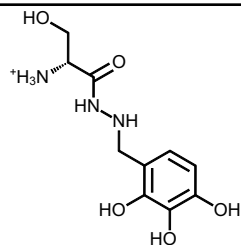

title: Benserazide  
hydrochloride  
ENZYME: Ace2  
docking score: -5.928

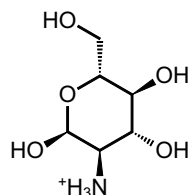

title: S3694 Glucosamine  
(hydrochloride)  
ENZYME: Ace2  
docking score: -5.568

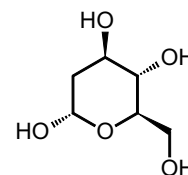

title: S4701 2-Deoxy-D-  
glucose  
ENZYME: Ace2  
docking score: -5.181

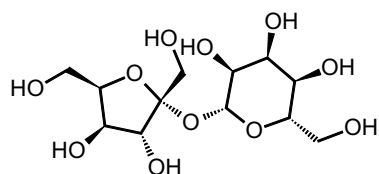

title: Inulin  
ENZYME: Ace2  
docking score: -5.175

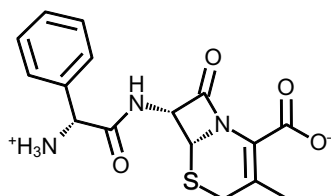

title: CEPHALEXIN  
(cephalexin)  
ENZYME: Ace2  
docking score: -5.108

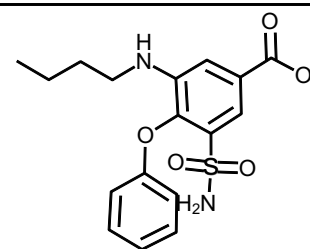

title: Bumetanide  
ENZYME: TMPRSS2  
docking score: -6.495

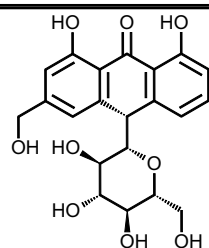

title: Aloin  
ENZYME: TMPRSS2  
docking score: -6.451

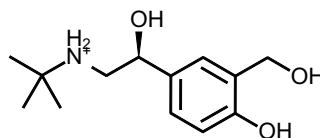

title: Salbutamol sulfate  
ENZYME: TMPRSS2  
docking score: -6.1

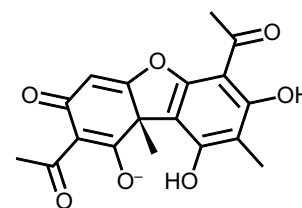

title: S4953 Usnic acid  
ENZYME: TMPRSS2  
docking score: -5.8

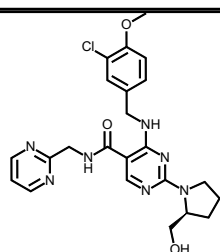

title: Avanafil  
ENZYME: TMPRSS2  
docking score: -5.616

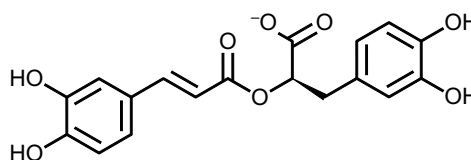

title: S3612 Rosmarinic acid  
ENZYME: TMPRSS2  
docking score: -5.604

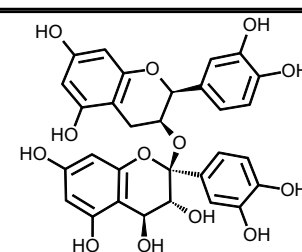

title: S5105  
ENZYME: TMPRSS2  
docking score: -5.505

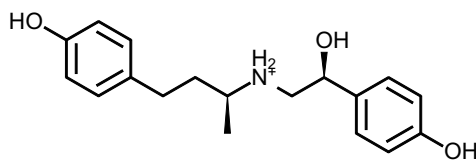

title: ractopamine  
hydrochloride  
ENZYME: TMPRSS2  
docking score: -5.218

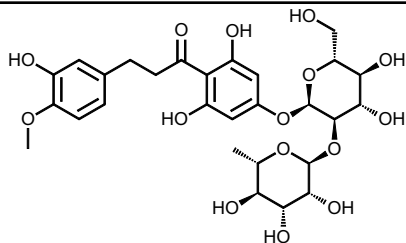

title: Neohesperidin  
dihydrochalcone  
ENZYME: TMPRSS2  
docking score: -5.202

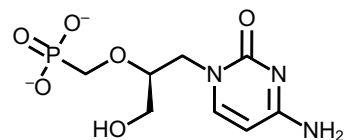

title: Cidofovir  
ENZYME: TMPRSS2  
docking score: -5.178

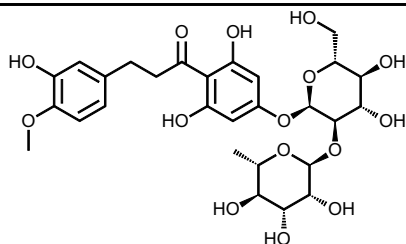

title: Neohesperidin  
dihydrochalcone  
ENZYME: TMPRSS2  
docking score: -5.029

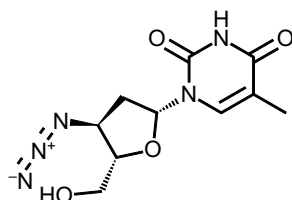

title: Zidovudine  
ENZYME: TMPRSS2  
docking score: -5.016
